1 Short title: *Aedes albopictus* distribution in the Democratic Republic of the Congo

2

3 **Geographic distribution and future expansion of *Aedes albopictus* in the Democratic**

4 **Republic of the Congo**

5

6 Fabien Vulu<sup>1,2,3\*</sup>, Thierry Lengu Bobanga<sup>3</sup>, Toshihiko Sunahara<sup>2</sup>, Kyoko Futami<sup>2</sup>, Hu

7 Jinping<sup>2</sup>, Noboru Minakawa<sup>2</sup>

8

9 <sup>1</sup> Program for Nurturing Global Leaders in Tropical and Emerging Communicable Diseases,

10 Graduate School of Biomedical Sciences, Nagasaki University, Nagasaki, Japan; <sup>2</sup> Vector

11 Ecology & Environment Department, Institute of Tropical Medicine, Nagasaki University,

12 Nagasaki, Japan; <sup>3</sup> Services de Parasitologie et d'Entomologie, Département de Médecine

13 Tropicale, Faculté de Médecine, Université de Kinshasa, Democratic Republic of the Congo

14

15 \*Corresponding author: Fabien Vulu

16 E-mail: [cedricvulu2014@gmail.com](mailto:cedricvulu2014@gmail.com)

17

18 **Abstract**

19 *Aedes albopictus* with an Asian origin has been reported from central African countries. The  
20 establishment of this mosquito species poses a serious threat as the vector of various  
21 infectious diseases. Since information about *Ae. albopictus* in Democratic Republic of the  
22 Congo (DRC) is scarce, we investigated the current distribution of this mosquito species.  
23 Based on the factors affecting the distribution, we predicted future distribution. We conducted  
24 entomological surveys in Kinshasa and three neighboring cities from May 2017 to September  
25 2019. The survey was extended to seven inland cities. A total of 19 environmental variables  
26 were examined using the maximum entropy method to identify areas suitable for *Ae.*  
27 *albopictus* to establish a population. We found *Ae. albopictus* at 21 of 23 sites in Kinshasa  
28 and three neighboring cities. For the first time *Ae. albopictus* was also found from three of  
29 seven inland cities, while it was not found in four cities located in the eastern and  
30 southeastern parts of DRC. A maximum entropy model revealed that the occurrence of *Ae.*  
31 *albopictus* was positively associated with maximum temperature of the warmest month, and  
32 negatively associated with wider mean diurnal temperature range and enhanced vegetation  
33 index. The model predicted that most parts of DRC are suitable for the establishment of the  
34 mosquito. The unsuitable areas were the eastern and southeastern highlands, which have low  
35 temperatures and long dry seasons. We confirmed that *Ae. albopictus* is well established in  
36 Kinshasa and its neighboring cities. The expansion of *Ae. albopictus* to the inland is ongoing,  
37 and in the future the mosquito may establish in most parts of DRC.

38

39 **Key-words:** *Aedes* mosquito, maximum entropy model, MaxEnt, environmental variables.

40

41

## 42 **Introduction**

43 *Aedes albopictus* is an invasive mosquito and vector of human disease such arboviruses such  
44 as dengue and chikungunya arboviruses [1-5]. Originating from Asia [6, 7], *Ae. albopictus*  
45 has expanded its distribution globally [3]. In central Africa, this mosquito was first reported  
46 from Cameroon in 2000 [8], and subsequently was found in several other countries [9-13].  
47 Following the mosquito invasion into central Africa, numerous dengue and chikungunya  
48 outbreaks have occurred [12, 14-21].

49  
50 *Aedes aegypti* is considered to be the main vector of dengue and chikungunya (CHIKV)  
51 viruses; however, *Ae. albopictus* was largely responsible for the dengue and chikungunya  
52 outbreaks in Gabon in 2007 and 2010 [14, 17, 21]. Furthermore, *Ae. albopictus* is able to  
53 transmit the chikungunya virus variant possessing the E1-226V mutation more efficiently  
54 than *Ae. aegypti* [22, 23]. This mutation was first identified during the chikungunya outbreak  
55 in the African Indian Ocean islands in 2005 [24], and was later isolated in central Africa [18,  
56 19, 25].

57  
58 In DRC, 50,000 suspected cases were reported during the first chikungunya outbreaks in  
59 Kinshasa from 1999 to 2000 [16]. Chikungunya outbreaks also occurred in Kinshasa in 2012  
60 and 2019 and in the adjacent Kongo Central Province in 2019 [25, 26]. In addition, the  
61 number of dengue virus infections has also increased in recent years [ 26-29]. Although an  
62 apparent outbreak did not occur, an entomological study caught several *Aedes* mosquitoes  
63 infected with CHIKV in Kinshasa in 2014 [30]. Moreover, a study confirmed involvement of  
64 *Ae. albopictus* for transmitting CHIKV with the E1-A226V mutation in two cities, Matadi and  
65 Kasangulu, of Kongo Central Province during the 2019 chikungunya outbreak [25].

66 Curative treatments and vaccines are not available for dengue and chikungunya [31, 32], and  
67 thus vector control is a valuable available tool for reducing infections [ 33]. As such,  
68 understanding the current distribution of *Ae. albopictus* in DRC is an essential step for the  
69 control. Global level distribution models based on environmental variables indicate that  
70 almost the entire area of DRC is suitable for *A. albopictus* establishment [3, 34, 35]. These  
71 models were constructed without entomological data from DRC, and thus the provided  
72 information was too coarse to apply to local vector control. In the present study, we described  
73 the current distribution of *Ae. albopictus* in DRC based on locally available data. In particular,  
74 we provided detailed information for Kinshasa and the neighboring areas where chikungunya  
75 outbreaks recently occurred. We also revealed important environmental variables related to  
76 the distribution, and attempted to determine if the present distribution is static.

77

## 78 **Materials and methods**

### 79 **Study areas**

80 DRC is the largest country in Sub-Saharan Africa with an area of roughly 2,4 million km<sup>2</sup>,  
81 and possesses a diversity of landscapes and climates. The country is divided into six  
82 geographic regions (western, northern, far-northern, central, eastern, and southeastern) based  
83 on landscape and climate (Fig 1). The landscape of the western region is composed of the  
84 coastal plain, with hills and plateaus in the south. The vegetation type is mainly savannah,  
85 with a tropical humid climate and a three 3-month dry season. This region includes Kinshasa  
86 and Kongo Central province, where chikungunya and dengue outbreaks have occurred. The  
87 Congo Basin and equatorial forests largely occupy the northern region. This region has an  
88 equatorial climate without a dry season. The far-northern region is characterized with  
89 savannahs, and has a tropical humid climate with a three month dry season. Equatorial forests

90 occupy the northern part of the central region, whereas the southern part is mainly plateau  
91 with savannahs and steppes. The central region has a dry tropical climate with a three month  
92 dry season. High hills and mountains dominate the eastern region, and lush vegetation forms  
93 the mountain forests. The region has a temperate mountain climate without a distinct dry  
94 season. The southeastern region is dominated by high plateaus with savannahs. The region  
95 has a dry tropical climate with a six-month dry season.

96

97 **Fig 1. Distribution of *Ae. albopictus* in DRC.** Red dots depict the presence of *Ae.*  
98 *albopictus*, and green dots depict absence at the city level. Mosquitoes were sampled at  
99 several sites within Matadi, Kisantu, Kasangulu, Kinshasa, and Mbandaka, and *Ae. albopictus*  
100 was found at one site at least. Each geographic region is made up of multiple provinces,  
101 represented by boundaries.

102

103 We conducted entomological surveys at 32 sites within 11 cities across four different  
104 geographic regions except the eastern and far-northern regions, from May 2017 to September  
105 2019 (Table 1). First, we focused on the western region in which *Ae. albopictus* has been  
106 recorded [13, 25]. The survey in the western region included 14 sites within Kinshasa and  
107 nine sites in the three cities, Kasangulu, Kisantu, and Matadi, in Kongo Central Province.  
108 Since human-mediated dispersal of *Ae. albopictus* was an immediate concern, the survey also  
109 included nine sites along the major transportation routes (Congo River and national roads) in  
110 the other three regions (Fig 1). These sites were three sites within Mbandaka in the western  
111 part of the northern region; Tshikapa, Mbuji-Mayi, and Kalima in the central region and  
112 Lubumbashi, Kilwa, and Kashobwe in the southeastern region.

113

114 **Table 1. Sampling sites, methods and occurrence of *Ae. albopictus*.**

| Region, province / city    | Site             | Date               | Latitude  | Longitude | Method <sup>a</sup> | Occurrence |
|----------------------------|------------------|--------------------|-----------|-----------|---------------------|------------|
| <b>Central region</b>      |                  |                    |           |           |                     |            |
| Kasai/Tshikapa             | Tshikapa         | 2019/8             | S 06.417° | E 20.802° | Asp <sup>a</sup>    | Present    |
| Kasai Or / Mbuji-Mayi      | Bupole           | 2019/6             | S 06.134° | E 23.633° | BGS                 | Present    |
| Maniema / Kalima           | Kalima           | 2019/7             | S 03.073° | E 26.041° | Asp                 | Absent     |
| <b>Northwestern region</b> |                  |                    |           |           |                     |            |
| Equateur / Mbandaka        | Mbandaka         | 2019/7             | N 00.048° | E 18.260° | Asp                 | Absent     |
| Equateur / Mbandaka        | Mambenga         | 2017/5             | N 00.061° | E 18.266° | BGS                 | Present    |
| Equateur / Mbandaka        | Bombwanza        | 2018/5             | N 00.048° | E 18.284° | BGS                 | Present    |
| <b>Southeastern region</b> |                  |                    |           |           |                     |            |
| Haut-Katanga / Kilwa       | Kilwa            | 2017/8,<br>2018/10 | S 09.277° | E 28.336° | BGS / Asp           | Absent     |
| Haut-Katanga / Kashobwe    | Kashobwe         | 2017/8,<br>2018/10 | S 09.676° | E 28.614° | BGS / Asp           | Absent     |
| Haut-Katanga / Lubumbashi  | Bel air          | 2017/8,<br>2018/10 | S 11.662° | E 27.502° | BGS / Asp           | Absent     |
| <b>Western region</b>      |                  |                    |           |           |                     |            |
| Kinshasa / Kinshasa        | Lingwala         | 2019/9             | S 04.328° | E 15.302° | Asp                 | Present    |
| Kinshasa / Kinshasa        | Barumbu          | 2019/8             | S 04.311° | E 15.326° | Asp                 | Absent     |
| Kinshasa / Kinshasa        | Tshangu          | 2019/7             | S 04.419° | E 15.427° | Asp                 | Present    |
| Kinshasa / Kinshasa        | UPC              | 2019/4             | S 04.332° | E 15.297° | Asp                 | Present    |
| Kinshasa / Kinshasa        | Echangeur        | 2019/4             | S 04.375° | E 15.343° | Asp                 | Present    |
| Kinshasa / Kinshasa        | Uckin            | 2019/4             | S 04.352° | E 15.241° | Asp                 | Present    |
| Kinshasa / Kinshasa        | Don bosco        | 2019/4             | S 04.366° | E 15.207° | Asp                 | Present    |
| Kinshasa / Kinshasa        | Bu               | 2019/4             | S 04.299° | E 15.924° | BGS                 | Present    |
| Kinshasa / Kinshasa        | Malweka          | 2019/2             | S 04.376° | E 15.220° | Asp                 | Present    |
| Kinshasa / Kinshasa        | Mitendi          | 2019/2             | S 04.468° | E 15.235° | BGS                 | Present    |
| Kinshasa / Kinshasa        | Mbenseke         | 2019/2             | S 04.502° | E 15.226° | BGS                 | Present    |
| Kinshasa / Kinshasa        | Masanga Mbila    | 2018/12            | S 04.443° | E 15.279° | BGS                 | Present    |
| Kinshasa / Kinshasa        | Lingwala II      | 2018/12            | S 04.326° | E 15.305° | BGS                 | Absent     |
| Kinshasa / Kinshasa        | Ngamanzo         | 2018/9             | S04.173°  | E 15.539° | BGS / Asp           | Present    |
| Kongo-Central / Kasangulu  | Kasangulu        | 2019/9             | S 04.587° | E 15.169° | Asp                 | Present    |
| Kongo-Central / Kasangulu  | Manoka           | 2019/4             | S 04.588° | E 15.173° | Asp                 | Present    |
| Kongo-Central / Kinsatu    | Jardin botanique | 2019/9             | S 05.132° | E 15.077° | Asp                 | Present    |
| Kongo-Central / Kinsatu    | Kisantu          | 2019/8             | S 05.126° | E 15.070° | Asp                 | Present    |
| Kongo-Central / Matadi     | Kalankala        | 2019/9             | S 05.825° | E 13.460° | Asp                 | Present    |
| Kongo-Central / Matadi     | Soyo             | 2019/9             | S 05.841° | E 13.456° | Asp                 | Present    |
| Kongo-Central / Matadi     | Toulouse         | 2019/9             | S 05.842° | E 13.448° | Asp                 | Present    |
| Kongo-Central / Matadi     | Soyo II          | 2019/3             | S 05.842° | E 13.457° | Asp                 | Present    |
| Kongo-Central / Matadi     | Mvuzi            | 2019/3             | S 05.825° | E 13.460° | Asp                 | Present    |

<sup>a</sup> Asp: aspirator, BGS: BG sentinel trap.

## 116 **Mosquito sampling**

117 Within each site, sampling was focused on places around dwellings which are ecologically  
118 suitable for adults of *Ae. albopictus*, and places where residents reportedly experience  
119 frequent day-time mosquito bites. *Aedes* mosquitoes were collected with electric aspirators  
120 (Prokopack Aspirator, John W. Hock, Gainesville, USA) and/or BG sentinel traps (Biogents  
121 Inc, Regensburg, Germany) from 3:00 pm to 6:00 pm for three to seven consecutive days at  
122 each site. Sampled mosquitoes were identified morphologically to species according to  
123 Huang's identification keys [36]. When at least one *Ae. albopictus* was collected, the site was  
124 considered as a positive site. A distribution map was constructed using the Quantum  
125 Geographic Information System software version 3.4.13 (QGIS Development Team, 2020)  
126 (Fig 1).

127

## 128 **Environmental variables**

129 We reviewed literature related to modelling *Ae. albopictus* distribution using the maximum  
130 entropy software, MaxEnt [37]. This software is often used for modeling species distribution,  
131 and effectively handles a small number of collection sites [38-42]. Based on the review, we  
132 selected 18 environmental variables which had a permutation importance (PI) of at least 5%  
133 (Table 2) [34, 43-55]. PI indicates the importance of each variable in a MaxEnt model [56].  
134 Among the 18 variables, 15 climatic variables were obtained from the WorldClim database  
135 (<http://www.worldclim.com/version2>) [57]. This climate database provides average\_historical  
136 climate data from 1970 to 2000 with a spatial resolution of 1 km x 1 km. Digital elevation  
137 model (DEM) data was obtained from SRTM imagery/USGS with a resolution of 30.9 m (or  
138 1-arc second) (<https://www2.jpl.nasa.gov/srtm/>). The datasets of two vegetation variables,  
139 Enhanced Vegetation Index (EVI) and Normalized Differentiation Vegetation Index (NDVI),

140 were downloaded from Modis Vegetation Index/USGS with a resolution of 1km x 1 km  
 141 (<https://modis.gsfc.nasa.gov/data/dataproduct/mod13.php>). Dry season length was included in  
 142 addition to the variables obtained by the literature review [58].

143

144 **Table 2. Important environmental variables for *Aedes albopictus* distribution.**

| Code  | Variable                               | PI (%) | References               |
|-------|----------------------------------------|--------|--------------------------|
| Bio1  | Annual mean temperature                |        | [34, 47, 54]             |
| Bio2  | Mean diurnal temperature range         | 55.6   | [45, 49]                 |
| Bio4  | Temperature seasonality                |        | [43, 49]                 |
| Bio5  | Maximum temperature of warmest month   | 30.8   | [43, 45, 47]             |
| Bio6  | Minimum temperature of coldest month   |        | [43, 47]                 |
| Bio7  | Temperature annual range               |        | [45]                     |
| Bio10 | Mean temperature of warmest quarter    |        | [48, 50, 52, 53]         |
| Bio11 | Mean temperature of coldest quarter    |        | [46, 48, 50, 52, 53, 55] |
| Bio12 | Annual precipitation                   |        | [47, 55]                 |
| Bio13 | Precipitation of wettest month         |        | [43, 45, 47, 51]         |
| Bio14 | Precipitation of driest month          |        | [44, 47, 49]             |
| Bio15 | Precipitation seasonality              |        | [43]                     |
| Bio16 | Precipitation of wettest quarter       |        | [46]                     |
| Bio17 | Precipitation of driest quarter        |        | [46, 50, 55]             |
| Bio18 | Precipitation of warmest quarter       |        | [49, 54]                 |
| DEM   | Digital elevation model                |        | [54]                     |
| NVDI  | Normalized Difference Vegetation Index |        | [34]                     |
| EVI   | Enhanced vegetation index              | 13.6   | [55]                     |
|       | Dry season length                      |        | [58]                     |

Permutation importance values are given for variables selected in the final model.

145



146 **Modeling**

147 We selected environmental variables that were significantly different between positive and  
148 negative sites. A relationship of mosquito occurrence with each variable was examined using  
149 the Wilcoxon-Mann-Whitney test (GraphPad Prism version 8.4.2, GraphPad Software, San  
150 Diego, California USA). When numbers of sample size were insufficient ( $n < 4$ ) for the  
151 statistical test, we identified variables which had an extreme median value at negative sites  
152 versus positive sites. We first examined if a negative site median value was within the range  
153 of positive site values in the corresponding geographic region. When the median value was  
154 outside the range, we also compared it to the range of values from all positive sites including  
155 ones from the other regions. When the value was still outside the range, the variable was  
156 considered for modeling.

157 Between the selected variables, we examined the Pearson correlation coefficients [44]. When  
158 the coefficients were above 80%, we retained them based on their apparent importance in past  
159 studies (Table 2) [34, 43-55]. Dry season length was excluded from the analyses because of  
160 the absence of a raster file. Then, we ran a full model including all selected variables with the  
161 default settings of MaxEnt. Based on the results from the full model, we constructed a  
162 reduced model including variables that had a PI above 5%. Since our sample size was small,  
163 we modified the settings in MaxEnt using ten replications, linear feature, and cumulative  
164 output format. The PI from the latter model was used to identify the most important variables.  
165 Response curves were also used to determine how the model changes with a permutation of  
166 each variable. The area under the curve (AUC) was used to assess model accuracy. When an  
167 AUC value was above 0.75, the model was acceptable. With the outputs from the optimal  
168 model, we constructed a predicted geographical distribution map of *Ae. albopictus* in DRC  
169 using the QGIS software.

170 **Results**

171 We collected a total of 2,841 *Aedes* mosquitoes. Of which, 2,331 (82%) were *Ae. albopictus*,  
172 and 510 (18%) were *Ae. aegypti*. The former species was found at 25 of 32 sites within 7 of  
173 11 cities (Table 1, Fig 1). Within Kinshasa, *Ae. albopictus* was collected at 12 of 14 sites  
174 (Table 1). In Kongo Central Province, *Ae. albopictus* was collected at all nine sites. This  
175 species was collected at two of the three sites within one city in the western part of the  
176 northern region. In the central region, we found *Ae. albopictus* in the two cities in the  
177 southern part, Tshikapa and Mbuji-Mayi, but we did not find it in the city in the northeastern  
178 part, Kalima. We did not find *Ae. albopictus* in the three cities, Kilwa, Kashobwe and  
179 Lubumbashi, in the southeastern region (Table 1).

180

181 A total of 19 environmental variables were selected based on a literature review (Table 2).  
182 Wilcoxon-Mann-Whitney tests revealed that the precipitation of the warmest quarter was  
183 significantly greater at the positive sites compared with the negative sites; however, the  
184 differences were not statistically significant for the other variables (Fig 2). The medians of all  
185 environmental variables at the two negative sites in the western region were within the ranges  
186 of values at the positive sites of the same region (Fig 3). In the northern region, the medians  
187 from the negative sites were within the range of values from the positive sites except for the  
188 NVDI (Fig 3R). However, the median of NDVI was within the range of the values from the  
189 positive sites when all regions were considered. The medians of nine variables at the negative  
190 site in the central region were out of the ranges of the two positive sites. When all regions  
191 were considered, the medians were within the range of the positive sites. However, the  
192 maximum temperature of the warmest month at the negative site in the central region was  
193 lower than the range of all positive site values including ones from the other regions. The

194 same negative site of the central region had higher EVI and NDIV than the ranges of all  
195 positive sites. The medians of ten variables at the three negative sites in the southeastern  
196 region were outside the ranges of values at the positive sites. The negative sites had lower  
197 annual mean temperatures, a wider mean diurnal temperature range, lower minimum  
198 temperatures of the coldest month, lower mean temperatures of the coldest quarter, a wider  
199 temperature annual range, greater precipitation seasonality, lower precipitation of the driest  
200 quarter, lower precipitation of the warmest quarter, higher elevation, and longer dry season  
201 length than any of the positive sites. Lubumbashi is located in the southernmost and at the  
202 highest elevation among the sites in the southeastern region, and these environmental  
203 variables of the city were more extreme than the other sites.

204

205 **Fig 2. Comparisons of each environmental variable between the positive and negative**  
206 ***Ae. albopictus* collection sites.** Each panel shows the first quartile, the median, the third  
207 quartile, the minimum and the maximum values in positive (*Ae. albopictus* was found) and  
208 negative (the species was not found) sites by box plots. A: Annual mean temperature (°C); B:  
209 mean diurnal temperature range (°C); C: temperature seasonality (%); D: maximum  
210 temperature of warmest month (°C); E: minimum temperature of the coldest month (°C); F:  
211 mean temperature of the coldest quarter (°C); G: temperature annual range (°C); H: mean  
212 temperature of the warmest quarter (°C); I: annual precipitation (mm); J: precipitation of the  
213 wettest month (mm); K: precipitation of the driest month (mm); L: precipitation seasonality  
214 (%); M: precipitation of the wettest quarter (mm); N: precipitation of the driest quarter (mm);  
215 O: precipitation of the warmest quarter (mm); P: digital elevation model (m); Q: enhanced  
216 vegetation index; R: normalized difference vegetation index; S: dry season length (month).

217 An asterisk indicates that that the difference was statistically significant ( $p < 0.05$ ) with  
218 Wilcoxon-Mann-Whitney tests.

219

220 **Fig 3. Medians of each environmental variable at positive sites and negative sites of *Ae.***

221 ***albopictus* in the four regions.** A value for each site is depicted as a dot. The black horizontal

222 bars indicate the median and vertical bars indicate the range. A: annual mean temperature

223 ( $^{\circ}\text{C}$ ); B: mean diurnal temperature range ( $^{\circ}\text{C}$ ); C: temperature seasonality (%); D: maximum

224 temperature of warmest month ( $^{\circ}\text{C}$ ); E: minimum temperature of the coldest month ( $^{\circ}\text{C}$ ); F:

225 mean temperature of the coldest quarter ( $^{\circ}\text{C}$ ); G: temperature annual range ( $^{\circ}\text{C}$ ); H: mean

226 temperature of the warmest quarter ( $^{\circ}\text{C}$ ); I: annual precipitation (mm); J: precipitation of

227 wettest month (mm); K: precipitation of the driest month (mm); L: precipitation seasonality

228 (%); M: precipitation of the wettest quarter (mm); N: precipitation of the driest quarter (mm);

229 O: precipitation of the warmest quarter (mm); P: digital elevation model (m); Q: enhanced

230 vegetation index; R: normalized difference vegetation index; S: dry season length (month).

231

232 Of 12 selected variables, excluding dry season length, five pairs were highly correlated

233 among eight variables (S1 File). We chose annual mean temperature, mean diurnal

234 temperature range and the EVI over the others because the past studies showed that they were

235 more important. As a result, seven variables were included in the full MaxEnt analysis (Table

236 2). After the model selection, the optimal model contained three variables, maximum

237 temperature of the warmest month, mean diurnal temperature range, and EVI. Mean diurnal

238 temperature range was the most important variable, followed by maximum temperature of

239 warmest month, and EVI (Table 2). The AUC of the optimal model was 0.975. The response

240 curves revealed that the highest suitable area was predicted with EVI below  $-0.017$ ,

241 maximum temperature of the warmest month above 34.3 °C, and mean diurnal temperature  
242 below 6.5°C (Fig 4).

243

244 **Fig 4. Response curves for *Ae. albopictus* suitability in relation to mean diurnal**  
245 **temperature range (A), maximum temperature of warmest month (B), and enhanced**  
246 **vegetation index (C).** The curves show how each environmental variable affects the MaxEnt  
247 prediction. The red line is the mean response of the ten MaxEnt replications.

248

249 The model predicted that most of DRC is suitable for *Ae. albopictus* establishment (Fig 5).  
250 The suitability was high in the most parts of the western region; however, it varied between 0  
251 to 75% in the southern area of the region. The suitability was also high in the central region  
252 and the northern region although a noticeable area in the northeastern region had low  
253 suitability. The eastern part of the eastern region and the southern part of the southeastern  
254 region had low suitability. The model successfully predicted all positive sites within the  
255 highly suitable areas and all negative sites within the highly suitable areas in the western, the  
256 northwestern, and the central regions. However, the model predicted two negative sites, Kilwa  
257 and Kashobwe, in the southeastern region to be suitable whereas Lubumbashi was predicted  
258 as being unsuitable area.

259

260 **Fig 5. Suitability map of *Ae. albopictus* in DRC generated by the optimal MaxEnt model.**

261 Dots depict the presence (black) or absence (green) of *Ae. albopictus*. Only 24 out of the 32  
262 dots can be visualized because some sites are overlapped.

263

264 **Discussion**

265 The present study found *Aedes albopictus* in 25 sites in seven cities in DRC. This mosquito  
266 species was newly found in four cities in the western and central regions, but it was absent in  
267 the cities in the southeastern region where many environmental variables showed extreme  
268 values. The MaxEnt model revealed that the occurrence of *Ae. albopictus* was positively  
269 associated with maximum temperature of the warmest month, and negatively with wider  
270 mean diurnal temperature range and enhanced vegetation index. The model predicted that  
271 almost the entire area of DRC is suitable for the establishment of *Ae. albopictus*.

272

273 Within Kinshasa, *Ae. albopictus* was found at 12 of 14 collection sites. This mosquito species  
274 was recorded in Kinshasa for the first time in DRC in 2016 [13]. A recent study reported  
275 within this city a high level of larval infestation of *Ae. albopictus* in artificial containers  
276 together with *Ae. aegypti* [59]. In the adjacent province, *Ae. albopictus* was found at all 9  
277 collection sites within three cities, Kasangulu, Kisantu, and Matadi. The present study  
278 recorded this mosquito species in Kisantu for the first time, while it was recorded in Matadi  
279 and Kasangulu during the 2019 chikungunya outbreak. During the outbreak, *Ae. albopictus*  
280 was more abundant than *Ae. aegypti* in these two cities [25]. The findings from the present  
281 study were sufficient to conclude that *Ae. albopictus* is well established in the western part of  
282 the western region.

283

284 We also confirmed that *Ae. albopictus* has extended its distribution to the inland cities. This  
285 mosquito species was recorded in Mbandaka in the northern region for the first time. We  
286 collected *Ae. albopictus* in the city in 2017 and in the two consecutive years, indicating that  
287 this mosquito quickly spread to the area after its recording in Kinshasa in 2016. This species

288 was likely introduced to Mbandaka from the western region by traffic along the Congo River,  
289 which is the main transportation route to the northern region. In the Philippines a molecular  
290 study showed evidence of *Ae. aegypti* migrations with ships among the islands [60].

291

292 In contrast, we did not find *Ae. albopictus* in Kalima in the upriver region of the Congo River  
293 in the eastern part of the central region. The result is likely due to the distance and the poor  
294 access from the other areas where this species has become established. However, air flight  
295 activity is intense between the area and Kinshasa, and *Ae. albopictus* might be introduced by  
296 air in the future [61]. Either way, the result from one collection site is not enough to confirm  
297 the absence of this mosquito species in the region. On the other hand, *Ae. albopictus* was  
298 found at two cities in the southern part of the central region. The results are likely due to a  
299 larger amount of traffic and a shorter distance between Kinshasa and this area compared with  
300 Kalima. The access is also better through the major roads, and there are frequent flights  
301 between Kinshasa and the area.

302

303 We did not find *Ae. albopictus* at all three cities in the southeastern part of the southeastern  
304 region. The results may be partially due to the distances from the areas where this mosquito  
305 has been established. However, because Lubumbashi is the second largest city in DRC, the  
306 amount of road traffic from the central and western regions is not negligible, and the flight  
307 activities are intense between Kinshasa and Lubumbashi. The intense traffic may introduce  
308 this mosquito species to the area in the near future [62].

309

310 Climate may limit the distribution of *Ae. albopictus* in the southeastern region. The medians  
311 of ten environmental variables at the negative sites in the southeastern region were outside the

312 ranges of the values from the positive sites of the other regions. The results indicate that the  
313 sites in the southeastern region are cooler, and the temperature fluctuates more because of the  
314 inland with high altitudes. Indeed, the MaxEnt model indicated that the climate variables  
315 (maximum temperature of the warmest month and mean diurnal temperature range) are  
316 important for establishment of this mosquito species. On the other hand, the model suggests  
317 that two negative sites, Kilwa and Kashobwe, in the southeastern region are suitable for *Ae.*  
318 *albopictus* establishment. The elevations of these sites are less than 1,000 m, the maximum  
319 temperature of warmest months is 31 to 32 °C and the mean annual temperatures are 23 to  
320 24 °C. Since *Ae. albopictus* could establish in temperate areas with an annual mean  
321 temperature of 11°C and/or 1,350 accumulated degree-days above 11°C per year [63-65], the  
322 temperatures of the two cities are warm enough. These model results suggest that the  
323 distances and traffic from the western region are likely the limiting factors, but this mosquito  
324 species may establish in these two sites in the future.

325

326 The model suggests that Lubumbashi is not suitable for *Ae. albopictus* survival. This city is  
327 situated at an elevation of about 1,200 m, and the mean annual temperature is 21°C. While the  
328 maximum temperature of the warmest month is 31°C, the minimum temperature of the  
329 coldest month, July, drops to 9 °C. The coldest month occurs in the middle of the six-month  
330 dry season when the monthly rainfall often becomes less than 1 mm. While the lengths of the  
331 dry season are similar among the three cities in the region, the lower temperature and wider  
332 diurnal temperature range may make the climate condition of Lubumbashi less favorable for  
333 *Ae. albopictus*. Even though eggs of this mosquito are tolerant to desiccation [66], egg  
334 survivorship would become less with decreases of temperature and humidity during the dry  
335 season [60, 67]. Furthermore, a greater fluctuation of temperature may make the conditions



336 less favorable for survival [67, 68]. The conditions may become even tougher for *Ae.*  
337 *albopictus* strains originating from tropic regions, which are less tolerant to cooler climate  
338 compared with strains from temperate regions [69, 70].

339

340 A study in Madagascar reported that the distribution of *Ae. albopictus* is largely limited to the  
341 eastern part of the island, with high humidity, a temperature of the coldest months above  
342 12 °C, and dry season shorter than six months in length [58]. The study, however, found *Ae.*  
343 *albopictus* breeding in used tires and captured adults in residential areas in the southwestern  
344 region with an annual precipitation less than 600 mm and an eight-month dry season. The  
345 findings in Madagascar suggest that this mosquito species is able to establish in an area where  
346 suitable man-made habitats are available as long as the temperature is warm enough.

347 Although *Ae. albopictus* distribution in Asia, from which it originated, occurs more in rural  
348 areas with greater vegetation, it also utilizes artificial habitats such as discarded containers in  
349 urban areas [1, 13]. Probably the entry point of a new region is likely an urban area with a  
350 larger amount of traffic. This partially explains the negative association of this species with  
351 the enhanced vegetation index indicated by the MaxEnt model.

352

353 Although our field survey did not cover the far-northern region and the eastern region, the  
354 model suggests that most of the far-northern region and the western part of the eastern region  
355 are also suitable for establishment of this mosquito species. *Ae. albopictus* might have already  
356 reached these regions, or it may reach there in the near future. In contrast, the model suggests  
357 that the eastern part of the eastern region is not suitable for this mosquito species. The area is

358 2,000 m above sea level, and includes mountains above 4,000 m. The harsh climate likely  
359 does not allow *Ae. albopictus* to establish in the area [63-65].

360

### 361 **Limitation**

362 The number of collection sites was small relative to the size of the country. Including the far-  
363 northern region and the eastern region, a larger number of collection sites could provide a  
364 better picture of the relationships of *Ae. albopictus* with the environmental variables. The  
365 Wilcoxon-Mann-Whitney tests revealed that precipitation of the warmest quarter was greater  
366 at the positive sites than the negative sites. Although this is the only variable statistically  
367 different between them, other variables might become significant with a larger number of  
368 collection sites.

369

370 We collected mosquitoes mainly within urban areas. Mosquitoes are more frequently  
371 introduced to urban areas with human activities, and thus sampling approach was practical to  
372 identify sites in which *Ae. albopictus* was established when considering the large size of the  
373 country. For instance, with fewer negative sites, the Max Ent model might be affected by the  
374 highest EVI value at the single negative site in the central region. As a result, EVI became  
375 one of the three important environmental variables, and it was negatively associated with the  
376 presence of *Ae. albopictus*. This result contradicts the past studies in the other areas [71]. A  
377 more precise picture would be produced with a finer spatial scale which can recognize small  
378 patches of vegetation within an urban area, though it is still challenging with free satellite  
379 data.

380

381 The environmental variables used in the present study were selected based on studies  
382 conducted mostly in temperate areas, because few studies were conducted in Africa.  
383 Appropriate variables for the African situation might be different.

384

## 385 **Conclusion**

386 *Aedes albopictus* has established populations in the major cities of the western region of  
387 DRC. This mosquito species is expanding its geographical distribution toward the inland. The  
388 migration is likely facilitated by the major transportation routes including the Congo River.  
389 The MaxEnt model based on environmental variables suggests that most of the country is  
390 suitable for the establishment of *Ae. albopictus*, except the areas in the eastern and the  
391 southeastern parts of the country. The results from our study suggest that low temperatures  
392 and a long dry season limit the distribution of *Ae. albopictus*. This is the first report to provide  
393 the current and future *Ae. albopictus* distributions in DRC using locally collected mosquito  
394 data.

395

## 396 **Implication**

397 Autochthonous cases of chikungunya and dengue have been reported from the western region  
398 and the southern part of the central region where we found *Ae. albopictus* [72]. Although *Ae.*  
399 *albopictus* was found in the southwestern part of the northern region, autochthonous cases of  
400 the viral diseases have not been reported. The diseases have not been reported from the  
401 northern part of the central region and the southeastern region where we did not find this  
402 mosquito species. Moreover, the diseases have not been reported from the far-northern area  
403 and the eastern region. Our model implies that, following the expansion of mosquito  
404 distribution, chikungunya and dengue may also spread to most parts of the country in the near

405 future. Country-wide entomological surveillance is needed to detect the signs of impending  
406 epidemics.

407

#### 408 **Acknowledgments**

409 We would like to thank Pitshou Mampuya, Herve Michel Vulu and Kelvin Landu for their  
410 helpful contribution in the field activities. Fabien Vulu is grateful to the Program for  
411 Nurturing Global Leaders in Tropical and Emerging Communicable Diseases, Graduate  
412 school of Biomedical Sciences, Nagasaki University, and Japan International Cooperation  
413 Agency (JICA) for their support.

414

#### 415 **References**

- 416 1. Bonizzoni M, Gasperi G, Chen X, James AA. The invasive mosquito species *Aedes*  
417 *albopictus*: current knowledge and future perspectives. *Trends Parasitol.* 2013 Sep 1;  
418 29(9):460-8. <https://doi.org/10.1016/j.pt.2013.07.003> PMID: [23916878](#)
- 419 2. Weetman D, Kamgang B, Badolo A, Moyes CL, Shearer FM, Coulibaly M, et al.  
420 *Aedes* mosquitoes and *Aedes*-borne arboviruses in Africa: current and future threats.  
421 *Int J Environ Res Public Health.* 2018 Feb;15(2):220.  
422 <https://doi.org/10.3390/ijerph15020220> PMID: [29382107](#)
- 423 3. Kraemer MU, Sinka ME, Duda KA, Mylne AQ, Shearer FM, Barker CM, et al. The  
424 global distribution of the arbovirus vectors *Aedes aegypti* and *Ae. albopictus*. *Elife.*  
425 2015 Jun 30;4:e08347. <https://doi.org/10.7554/eLife.08347> PMID: [26126267](#)
- 426 4. Kamgang B, Vazeille M, Yougang AP, Tedjou AN, Wilson-Bahun TA, Mousson L, et  
427 al. Potential of *Aedes albopictus* and *Aedes aegypti* (Diptera: Culicidae) to transmit

- 428 yellow fever virus in urban areas in Central Africa. *Emerg Microbes Infect.* 2019 Jan  
429 1;8(1):1636-41. <https://doi.org/10.1080/22221751.2019.1688097> PMID: [31711378](https://pubmed.ncbi.nlm.nih.gov/31711378/)
- 430 5. Lounibos LP, Kramer LD. Invasiveness of *Aedes aegypti* and *Aedes albopictus* and  
431 vectorial capacity for chikungunya virus. *J Infect Dis.* 2016 Dec 15;214(suppl\_5):  
432 S453-8. <https://doi.org/10.1093/infdis/jiw285> PMID: [27920173](https://pubmed.ncbi.nlm.nih.gov/27920173/)
- 433 6. Maynard AJ, Ambrose L, Cooper RD, Chow WK, Davis JB, Muzari MO, et al. Tiger  
434 on the prowl: Invasion history and spatio-temporal genetic structure of the Asian tiger  
435 mosquito *Aedes albopictus* (Skuse 1894) in the Indo-Pacific. *PLoS Negl Trop Dis.*  
436 2017 Apr 14;11(4): e0005546. <https://doi.org/10.1371/journal.pntd.0005546>  
437 PMID: [28410388](https://pubmed.ncbi.nlm.nih.gov/28410388/)
- 438
- 439 7. Porretta D, Mastrantonio V, Bellini R, Somboon P, Urbanelli S. Glacial history of a  
440 modern invader: phylogeography and species distribution modelling of the Asian tiger  
441 mosquito *Aedes albopictus*. *PLoS One.* 2012;7(9):e44515.  
442 <https://doi.org/10.1371/journal.pone.0044515>. Epub 2012 Sep 6. PMID: [22970238](https://pubmed.ncbi.nlm.nih.gov/22970238/)
- 443 8. Fontenille D, Toto JC. *Aedes* (*Stegomyia*) *albopictus* (Skuse), a potential new Dengue  
444 vector in southern Cameroon. *Emerg Infect Dis.* 2001 Nov-Dec;7(6):1066-7.  
445 <https://doi.org/10.3201/eid0706.010631> PMID: [11747746](https://pubmed.ncbi.nlm.nih.gov/11747746/)
- 446 9. Toto JC, Abaga S, Carnevale P, Simard F. First report of the oriental mosquito *Aedes*  
447 *albopictus* on the West African island of Bioko, Equatorial Guinea. *Med Vet Entomol.*  
448 2003 Sep;17(3):343-6. <https://doi.org/10.1046/j.1365-2915.2003.00447.x>. PMID:  
449 [12941021](https://pubmed.ncbi.nlm.nih.gov/12941021/)

- 450 10. Coffinet T, Mourou JR, Pradines B, Toto JC, Jarjaval F, Amalvict R, et al. First record  
451 of *Aedes albopictus* in Gabon. *J Am Mosq Control Assoc.* 2007 Dec;23(4):471-2.  
452 <https://doi.org/10.2987/5636.1> PMID: [18240521](#)
- 453 11. Diallo M, Laganier R, Nangouma A. First record of *Ae. albopictus* (Skuse 1894), in  
454 Central African Republic. *Trop Med Int Health.* 2010 Oct;15(10):1185-9.  
455 <https://doi.org/10.1111/j.1365-3156.2010.02594.x> PMID: [20831673](#)
- 456 12. Mombouli JV, Bitsindou P, Elion DO, Grolla A, Feldmann H, Niama FR, et al.  
457 Chikungunya virus infection, Brazzaville, Republic of Congo, 2011. *Emerg Infect Dis.*  
458 2013;19(9):1542-3. <https://doi.org/10.3201/eid1909.130451> PMID: [23968609](#)
- 459 13. Bobanga T, Moyo M, Vulu F, Irish SR. First report of *Aedes albopictus* (Diptera:  
460 Culicidae) in the Democratic Republic of Congo. *Afr Entomol.* 2018 Mar 1;26(1):234-  
461 6. <https://doi.org/10.4001/003.026.0234>
- 462 14. Leroy EM, Nkoghe D, Ollomo B, Nze-Nkoghe C, Becquart P, Grard G, Pourrut X,  
463 Charrel R, Moureau G, Ndjoyi-Mbiguino A, De-Lamballerie X. Concurrent  
464 chikungunya and dengue virus infections during simultaneous outbreaks, Gabon,  
465 2007. *Emerg Infect Dis.* 2009 Apr;15(4):591-3.  
466 <https://doi.org/10.3201/eid1504.080664> PMID: [19331740](#)
- 467 15. Nkoghe D, Kassa RF, Bisvigou U, Caron M, Grard G, Leroy EM. No clinical or  
468 biological difference between Chikungunya and Dengue Fever during the 2010  
469 Gabonese outbreak. *Infect Dis Rep.* 2012 Jan 3;4(1):e5.  
470 <https://doi.org/10.4081/idr.2012.e5> PMID: [24470935](#)

- 471 16. Muyembe-Tamfum JJ, Peyrefitte CN, Yogolelo R, Basisya EM, Koyange D, Pukuta  
472 E, et al. LETTRES-Epidemies a virus Chikungunya en 1999 et 2000 en Republique  
473 Democratique du Congo. *Med Trop.* 2003;63(6):637-8. PMID: [15077435](#)
- 474 17. Pagès F, Peyrefitte CN, Mve MT, Jarjaval F, Brisse S, Iteman I, et al. *Aedes*  
475 *albopictus* mosquito: the main vector of the 2007 Chikungunya outbreak in Gabon.  
476 *PLoS One.* 2009;4(3):e4691. <https://doi.org/10.1371/journal.pone.0004691> PMID:  
477 [19259263](#)
- 478 18. Fritz M, Taty Taty R, Portella C, Guimbi C, Mankou M, Leroy EM, et al. Re-  
479 emergence of chikungunya in the Republic of the Congo in 2019 associated with a  
480 possible vector-host switch. *Int J Infect Dis.* 2019 Jul;84:99-101.  
481 <https://doi.org/10.1016/j.ijid.2019.05.013> PMID: [31096054](#)
- 482 19. Maurice D, Alain SM, Christophe V, Rene N, Irene KT, Marthe IN, et al. Molecular  
483 characterization of chikungunya virus from three regions of Cameroon. *Virologica Sinica.*  
484 2015 Dec;30(6):470-3. <https://doi.org/10.1007/s12250-015-3663-7> PMID: [26715303](#)
- 485 20. Paupy C, Ollomo B, Kamgang B, Moutailler S, Rousset D, Demanou M, et al.  
486 Comparative role of *Aedes albopictus* and *Aedes aegypti* in the emergence of Dengue  
487 and Chikungunya in central Africa. *Vector Borne Zoonotic Dis.* 2010 Apr;10(3):259-  
488 66. <https://doi.org/10.1089/vbz.2009.0005> PMID: [19725769](#)
- 489 21. Paupy C, Kassa Kassa F, Caron M, Nkoghé D, Leroy EM. A chikungunya outbreak  
490 associated with the vector *Aedes albopictus* in remote villages of Gabon. *Vector Borne*  
491 *Zoonotic Dis.* 2012 Feb;12(2):167-9. <https://doi.org/10.1089/vbz.2011.0736> PMID:  
492 [22141733](#)

- 493 22. Tsetsarkin KA, Vanlandingham DL, McGee CE, Higgs S. A single mutation in  
494 chikungunya virus affects vector specificity and epidemic potential. *PLoS Pathog.*  
495 2007 Dec;3(12):e201. <https://doi.org/10.1371/journal.ppat.0030201> PMID: [18069894](https://pubmed.ncbi.nlm.nih.gov/18069894/)
- 496 23. Vazeille M, Moutailler S, Coudrier D, Rousseaux C, Khun H, Huerre M, et al. Two  
497 Chikungunya isolates from the outbreak of La Reunion (Indian Ocean) exhibit  
498 different patterns of infection in the mosquito, *Aedes albopictus*. *PLoS One.* 2007 Nov  
499 14;2(11):e1168. <https://doi.org/10.1371/journal.pone.0001168> PMID: [18000540](https://pubmed.ncbi.nlm.nih.gov/18000540/)
- 500 24. Schuffenecker I, Itean I, Michault A, Murri S, Frangeul L, Vaney MC, et al.  
501 Genome microevolution of chikungunya viruses causing the Indian Ocean outbreak.  
502 *PLoS Med.* 2006 Jul;3(7):e263. <https://doi.org/10.1371/journal.pmed.0030263> PMID:  
503 [16700631](https://pubmed.ncbi.nlm.nih.gov/16700631/)
- 504 25. Selhorst P, Makiala-Mandanda S, De Smet B, Mariën J, Anthony C, Binene-Mbuka  
505 G, et al. Molecular characterization of chikungunya virus during the 2019 outbreak in  
506 the Democratic Republic of the Congo. *Emerg Microbes Infect.* 2020 Jan 1;9(1):1912-  
507 8. <https://doi.org/10.1080/22221751.2020.1810135> PMID: [32787529](https://pubmed.ncbi.nlm.nih.gov/32787529/) 24
- 508 26. Malekani MJ, Mccollum AM, Monroe B, Malekani V, Mulumba M, Nguete B, et al.  
509 Cas de dengue chez les patients suspects de chikungunya à Kinshasa. *Ann Afr Med.*  
510 2014;7:2. 26
- 511 27. Makiala-Mandanda S, Ahuka-Mundeke S, Abbate JL, Pukuta-Simbu E, Nsio-Mbeta J,  
512 Berthet N, et al. Identification of Dengue and Chikungunya Cases Among Suspected  
513 Cases of Yellow Fever in the Democratic Republic of the Congo. *Vector Borne*  
514 *Zoonotic Dis.* 2018 Jul;18(7):364-370. <https://doi.org/10.1089/vbz.2017.2176> PMID:  
515 [29768102](https://pubmed.ncbi.nlm.nih.gov/29768102/)



- 516 28. Proesmans S, Katshongo F, Milambu J, Fungula B, Mavoko HM, Ahuka-Mundeke S,  
517 et al. Dengue and Chikungunya among Febrile Outpatients in Kinshasa, Democratic  
518 Republic of Congo: a cross-sectional study. *Plos Negl Trop Dis*. 2019 Sept  
519 5:e0007047. <https://doi.org/10.1371/journal.pntd.0007047> PMID : [31487279](https://pubmed.ncbi.nlm.nih.gov/31487279/)
- 520 29. Willcox AC, Collins MH, Jadi R, Keeler C, Parr JB, Mumba D, et al.  
521 Seroepidemiology of Dengue, Zika, and Yellow Fever Viruses among Children in the  
522 Democratic Republic of the Congo. *Am J Trop Med Hyg*. 2018 Sep;99(3):756-763.  
523 <https://doi.org/10.4269/ajtmh> PMID: [29988000](https://pubmed.ncbi.nlm.nih.gov/29988000/)
- 524 30. Mbanzulu KM, Wumba R, Mukendi JP, Zanga JK, Shija F, Bobanga TL, et al.  
525 Mosquito-borne viruses circulating in Kinshasa, Democratic Republic of the Congo.  
526 *Int J Infect Dis*. 2017 Apr 1; 57:32-7. <https://doi.org/10.1016/j.ijid.2017.01.016>  
527 PMID: [28153792](https://pubmed.ncbi.nlm.nih.gov/28153792/)
- 528 31. Prompetchara E, Ketloy C, Thomas SJ, Ruxrungtham K. Dengue vaccine: Global  
529 development update. *Asian Pac J Allergy Immunol*. 2020 Sep;38(3):178-185.  
530 <https://doi.org/10.12932/AP-100518-0309> PMID: [30660171](https://pubmed.ncbi.nlm.nih.gov/30660171/)
- 531 32. Bhat SM, Mudgal PP, N S, Arunkumar G. Spectrum of candidate molecules against  
532 Chikungunya virus - an insight into the antiviral screening platforms. *Expert Rev Anti*  
533 *Infect Ther*. 2019 Apr;17(4):243-264.  
534 <https://doi.org/10.1080/14787210.2019.1595591> PMID: [30889372](https://pubmed.ncbi.nlm.nih.gov/30889372/)
- 535 33. Achee NL, Grieco JP, Vatandoost H, Seixas G, Pinto J, Ching-Ng L, Martins AJ,  
536 Juntarajumnong W, Corbel V, Gouagna C, David JP, Logan JG, Orsborne J, Marois E,  
537 Devine GJ, Vontas J. Alternative strategies for mosquito-borne arbovirus control.  
538 *PLoS Negl Trop Dis*. 2019 Mar 26;13(3):e0007275.  
539 <https://doi.org/10.1371/journal.pntd.0007275> PMID: [30913223](https://pubmed.ncbi.nlm.nih.gov/30913223/)

- 540 34. Yañez-Arenas C, Rioja-Nieto R, Martín GA, Dzul-Manzanilla F, Chiappa-Carrara X,  
541 Buenfil-Ávila A, et al. Characterizing environmental suitability of *Aedes albopictus*  
542 (Diptera: Culicidae) in Mexico based on regional and global niche models. *J Med*  
543 *Entomol.* 2018 Jan 10;55(1):69-77. <https://doi.org/10.1093/jme/tjx185> PMID:  
544 [29186544](https://pubmed.ncbi.nlm.nih.gov/29186544/)
- 545 35. Benedict MQ, Levine RS, Hawley WA, Lounibos LP. Spread of the tiger: global risk  
546 of invasion by the mosquito *Aedes albopictus*. *Vector Borne Zoonotic Dis.* 2007  
547 *Spring*;7(1):76-85. <https://doi.org/10.1089/vbz.2006.0562> PMID: [17417960](https://pubmed.ncbi.nlm.nih.gov/17417960/)
- 548 36. Huang YM. The subgenus *Stegomyia* of *Aedes* in the Afrotropical Region with keys  
549 to the species (Diptera: Culicidae). *Zootaxa.* 2004 Oct 27;700(1):1-120.  
550 <https://doi.org/10.11646/zootaxa.700.1.1>
- 551 37. Phillips SJ, Dudík M, Schapire RE. [Internet]. Maxent Software for Modeling  
552 Species Niches and Distributions (Version 3.4.1). 2018. Available from url  
553 [http://biodiversityinformatics.amnh.org/open\\_source/maxent/](http://biodiversityinformatics.amnh.org/open_source/maxent/), Accessed 9th Jan 2018
- 554
- 555 38. Phillips SJ, Anderson RP, Schapire RE. Maximum entropy modeling of species  
556 geographic distributions. *Ecol Modell.* 2006 Jan 25;190(3-4):231-59.  
557 <https://doi.org/10.1016/j.ecolmodel.2005.03.026>
- 558 39. Pearson RG, Raxworthy CJ, Nakamura M, Townsend Peterson A. Predicting species  
559 distributions from small numbers of occurrence records: a test case using cryptic  
560 geckos in Madagascar. *Journal Biogeogr.* 2007 Jan;34(1):102-17.  
561 <https://doi.org/10.1111/j.1365-2699.2006.01594.x>

- 562 40. Thibaud E, Petitpierre B, Broennimann O, Davison AC and Guisan A. Measuring the  
563 relative effect of factors affecting species distribution model predictions. *Methods*  
564 *Ecol Evol.* 2014;-5(9), 947-55. <https://doi.org/10.1111/2041-210X.12203>
- 565 41. Aguirre-Gutiérrez J, Carvalheiro LG, Polce C, van Loon EE, Raes N, Reemer M, et al.  
566 Fit-for-purpose: species distribution model performance depends on evaluation criteria  
567 - Dutch Hoverflies as a case study. *PLoS One.* 2013 May 14;8(5):e63708.  
568 <https://doi.org/10.1371/journal.pone.0063708> PMID: [23691089](https://pubmed.ncbi.nlm.nih.gov/23691089/)
- 569 42. Elith J, Graham HC, Anderson PR, Dudík M, Ferrier S, Guisan A, et al. Novel  
570 methods improve prediction of species' distributions from occurrence data.  
571 *Ecography.* 2006 Apr;29(2):129-51. <https://doi.org/10.1111/j.2006.0906-7590.04596.x>
- 572 43. Lubinda J, Treviño C JA, Walsh MR, Moore AJ, Hanafi-Bojd AA, Akgun S, et al.  
573 Environmental suitability for *Aedes aegypti* and *Aedes albopictus* and the spatial  
574 distribution of major arboviral infections in Mexico. *Parasite Epidemiol Control.* 2019  
575 Aug 12;6:e00116. <https://doi.org/10.1016/j.parepi.2019.e00116> PMID: [31528740](https://pubmed.ncbi.nlm.nih.gov/31528740/)
- 576 44. Johnson TL, Haque U, Monaghan AJ, Eisen L, Hahn MB, Hayden MH, et al.  
577 Modeling the Environmental Suitability for *Aedes* (*Stegomyia*) *aegypti* and *Aedes*  
578 (*Stegomyia*) *albopictus* (Diptera: Culicidae) in the Contiguous United States. *J Med*  
579 *Entomol.* 2017 Nov 7;54(6):1605-1614. <https://doi.org/10.1093/jme/tjx163> PMID:  
580 [29029153](https://pubmed.ncbi.nlm.nih.gov/29029153/)
- 581 45. Tiffin HS, Peper ST, Wilson-Fallon AN, Haydett KM, Cao G, Presley SM. The  
582 Influence of New Surveillance Data on Predictive Species Distribution Modeling  
583 of *Aedes aegypti* and *Aedes albopictus* in the United States. *Insects.* 2019 Nov  
584 12;10(11):400. <https://doi.org/10.3390/insects10110400> PMID: [31718099](https://pubmed.ncbi.nlm.nih.gov/31718099/)

- 585 46. Shabani F, Shafapour Tehrani M, Solhjoui-Fard S, Kumar L. A comparative  
586 modeling study on non-climatic and climatic risk assessment on Asian Tiger Mosquito  
587 (*Aedes albopictus*). PeerJ. 2018 Mar 19;6:e4474. <https://doi.org/10.7717/peerj.4474>  
588 PMID: [29576954](https://pubmed.ncbi.nlm.nih.gov/29576954/)
- 589 47. Medley KA. Niche shifts during the global invasion of the Asian tiger mosquito,  
590 *Aedes albopictus* Skuse (Culicidae), revealed by reciprocal distribution models. Glob  
591 ecol Biogeogr. 2010 Jan;19(1):122-33. [https://doi.org/10.1111/j.1466-](https://doi.org/10.1111/j.1466-8238.2009.00497.x)  
592 [8238.2009.00497.x](https://doi.org/10.1111/j.1466-8238.2009.00497.x)
- 593 48. Cunze S, Koch LK, Kochmann J, Klimpel S. *Aedes albopictus* and *Aedes japonicus* -  
594 two invasive mosquito species with different temperature niches in Europe. Parasit  
595 Vectors. 2016 Dec 6;9(1):629. <https://doi.org/10.1186/s13071-016-1893-7> PMID:  
596 [27919276](https://pubmed.ncbi.nlm.nih.gov/27919276/)
- 597 49. Liu B, Gao X, Ma J, Jiao Z, Xiao J, Hayat MA, et al. Modeling the present and future  
598 distribution of arbovirus vectors *Aedes aegypti* and *Aedes albopictus* under climate  
599 change scenarios in Mainland China. Sci Total Environ. 2019 May 10;664:203-14.  
600 <https://doi.org/10.1016/j.scitotenv.2019.01.301> PMID: [30743113](https://pubmed.ncbi.nlm.nih.gov/30743113/)
- 601 50. Santos J, Meneses BM. An integrated approach for the assessment of the *Aedes*  
602 *aegypti* and *Aedes albopictus* global spatial distribution, and determination of the  
603 zones susceptible to the development of Zika virus. Acta Trop. 2017 Apr;168:80-90.  
604 <https://doi.org/10.1016/j.actatropica.2017.01.015> PMID: [28111132](https://pubmed.ncbi.nlm.nih.gov/28111132/)
- 605 51. Hill MP, Axford JK, Hoffmann AA. Predicting the spread of *Aedes albopictus* in  
606 Australia under current and future climates: Multiple approaches and datasets to

- 607 incorporate potential evolutionary divergence. *Austral ecol.* 2014 Jun;39(4):469-78.  
608 <https://doi.org/10.1111/aec.12105>
- 609 52. Koch LK, Cunze S, Werblow A, Kochmann J, Dörge DD, Mehlhorn H, Klimpel S.  
610 Modeling the habitat suitability for the arbovirus vector *Aedes albopictus* (Diptera:  
611 Culicidae) in Germany. *Parasitol Res.* 2016 Mar;115(3):957-64.  
612 <https://doi.org/10.1007/s00436-015-4822-3> PMID: [26634351](https://pubmed.ncbi.nlm.nih.gov/26634351/)
- 613 53. Cunze S, Kochmann J, Koch LK, Klimpel S. *Aedes albopictus* and Its Environmental  
614 Limits in Europe. *PLoS One.* 2016 Sep 7;11(9):e0162116.  
615 <https://doi.org/10.1371/journal.pone.0162116> PMID: [27603669](https://pubmed.ncbi.nlm.nih.gov/27603669/)
- 616 54. Hira FS, Asad A, Farrah Z, Basit RS, Mehreen F, Muhammad K. Patterns of  
617 occurrence of dengue and chikungunya, and spatial distribution of mosquito vector  
618 *Aedes albopictus* in Swabi district, Pakistan. *Trop Med Int Health.* 2018  
619 Sep;23(9):1002-1013. <https://doi.org/10.1111/tmi.13125> PMID: [29956428](https://pubmed.ncbi.nlm.nih.gov/29956428/)
- 620 55. Wiese D, Escalante AA, Murphy H, Henry KA, Gutierrez-Velez VH. Integrating  
621 environmental and neighborhood factors in MaxEnt modeling to predict species  
622 distributions: A case study of *Aedes albopictus* in southeastern Pennsylvania. *PLoS*  
623 *One.* 2019 Oct 17;14(10):e0223821. <https://doi.org/10.1371/journal.pone.0223821>  
624 PMID: [31622396](https://pubmed.ncbi.nlm.nih.gov/31622396/)
- 625 56. Magadzire N, De Klerk HM, Esler KJ, Slingsby JA. Fire and life history affect the  
626 distribution of plant species in a biodiversity hotspot. *Divers Distrib.* 2019  
627 Jul;25(7):1012-23. <https://doi.org/10.1111/ddi.12921>

- 628 57. Fick SE, Hijmans RJ. WorldClim 2: new 1-km spatial resolution climate surfaces for  
629 global land areas. *Int J of climatol.* 2017 Oct;37(12):4302-15.  
630 <https://doi.org/10.1002/joc.5086>
- 631 58. Fontenille D, Rodhain F. Biology and distribution of *Aedes albopictus* and *Aedes*  
632 *aegypti* in Madagascar. *J Am Mosq Control Assoc.* 1989 Jun;5(2):219-25. PMID:  
633 [2746207](https://pubmed.ncbi.nlm.nih.gov/2746207/)
- 634 59. Francis WT, Sylvie F, Zola ME, Carmen MMd, Guillaume BM, Gillon I et al.  
635 Important *Aedes* Spp. Infestation Levels in Kinshasa, Democratic Republic of Congo.  
636 Research Square. 2020. <https://doi.org/10.21203/rs.3.rs-37427/v4>
- 637 60. Fonzi E, Higa Y, Bertuso AG, Futami K, Minakawa N. Human-Mediated Marine  
638 Dispersal Influences the Population Structure of *Aedes aegypti* in the Philippine  
639 Archipelago. *PLoS Negl Trop Dis.* 2015 Jun 3;9(6):e0003829.  
640 <https://doi.org/10.1371/journal.pntd.0003829> PMID: [26039311](https://pubmed.ncbi.nlm.nih.gov/26039311/)
- 641 61. Gratz NG, Steffen R, Cocksedge W. Why aircraft disinsection? *Bull World Health*  
642 *Organ.* 2000;78(8):995-1004. PMID: [10994283](https://pubmed.ncbi.nlm.nih.gov/10994283/)
- 643 62. Ibáñez-Justicia A, Alcaraz-Hernández JD, van Lammeren R, Koenraadt CJM,  
644 Bergsma A, Delucchi L, Rizzoli A, Takken W. Habitat suitability modelling to assess  
645 the introductions of *Aedes albopictus* (Diptera: Culicidae) in the Netherlands. *Parasit*  
646 *Vectors.* 2020 Apr 26;13(1):217. <https://doi.org/10.1186/s13071-020-04077-3> PMID:  
647 [32336286](https://pubmed.ncbi.nlm.nih.gov/32336286/)
- 648 63. Kobayashi M, Nihei N, Kurihara T. Analysis of northern distribution of *Aedes*  
649 *albopictus* (Diptera: Culicidae) in Japan by geographical information system. *J Med*

- 650 Entomol. 2002 Jan;39(1):4-11. <https://doi.org/10.1603/0022-2585-39.1.4> PMID:  
651 [11931270](https://pubmed.ncbi.nlm.nih.gov/11931270/)
- 652 64. Eritja R, Escosa R, Lucientes J, Marques E, Roiz D, Ruiz S. Worldwide invasion of  
653 vector mosquitoes: present European distribution and challenges for Spain. Biol  
654 invasions. 2005 Mar;7(1):87-97. <https://doi.org/10.1007/s10530-004-9637-6>
- 655 65. Wu F, Liu Q, Lu L, Wang J, Song X, Ren D. Distribution of *Aedes albopictus*  
656 (Diptera: Culicidae) in northwestern China. Vector Borne Zoonotic Dis. 2011  
657 Aug;11(8):1181-6. <https://doi.org/10.1089/vbz.2010.0032> PMID: [21254912](https://pubmed.ncbi.nlm.nih.gov/21254912/)
- 658 66. Mogi M, Miyagi I, Abadi K, Syafruddin. Inter- and intraspecific variation in  
659 resistance to desiccation by adult *Aedes* (*Stegomyia*) spp. (Diptera: Culicidae) from  
660 Indonesia. J Med Entomol. 1996 Jan;33(1):53-7.  
661 <https://doi.org/10.1093/jmedent/33.1.53> PMID: [8906905](https://pubmed.ncbi.nlm.nih.gov/8906905/)
- 662 67. Juliano SA, O'Meara GF, Morrill JR, Cutwa MM. Desiccation and thermal tolerance  
663 of eggs and the coexistence of competing mosquitoes. Oecologia. 2002 Feb  
664 1;130(3):458-469. <https://doi.org/10.1007/s004420100811> PMID: [20871747](https://pubmed.ncbi.nlm.nih.gov/20871747/)
- 665 68. Carrington LB, Seifert SN, Willits NH, Lambrechts L, Scott TW. Large diurnal  
666 temperature fluctuations negatively influence *Aedes aegypti* (Diptera: Culicidae) life-  
667 history traits. J Med Entomol. 2013 Jan;50(1):43-51. <https://doi.org/10.1603/me11242>  
668 PMID: [23427651](https://pubmed.ncbi.nlm.nih.gov/23427651/)
- 669 69. Thomas SM, Obermayr U, Fischer D, Kreyling J, Beierkuhnlein C. Low-temperature  
670 threshold for egg survival of a post-diapause and non-diapause European aedine strain,

- 671            *Aedes albopictus* (Diptera: Culicidae). *Parasit Vectors*. 2012 May 23;5:100.  
672            <https://doi.org/10.1186/1756-3305-5-100> PMID: [22621367](#)
- 673            70. Tippelt L, Werner D, Kampen H. Low temperature tolerance of three *Aedes*  
674            *albopictus* strains (Diptera: Culicidae) under constant and fluctuating temperature  
675            scenarios. *Parasit Vectors*. 2020 Nov 23;13(1):587. [https://doi.org/10.1186/s13071-](https://doi.org/10.1186/s13071-020-04386-7)  
676            [020-04386-7](https://doi.org/10.1186/s13071-020-04386-7) PMID: [33225979](#)
- 677            71. Soares APM, Rosário ING, Silva IM. Distribution and preference for oviposition sites  
678            of *Aedes albopictus* (Skuse) in the metropolitan area of Belém, in the Brazilian  
679            Amazon. *J Vector Ecol*. 2020 Dec;45(2):312-320. <https://doi.org/10.1111/jvec.12402>  
680            PMID: [33207062](#)
- 681            72. Mbanzulu KM, Mboera LEG, Luzolo FK, Wumba R, Misinzo G, Kimera SI.  
682            Mosquito-borne viral diseases in the Democratic Republic of the Congo: a review.  
683            *Parasit Vectors*. 2020 Feb 27;13(1):103. <https://doi.org/10.1186/s13071-020-3985-7>  
684            PMID: [32103776](#)  
685



686 **Supporting file captions**

687 **S1 File. Pearson correlations between environmental variables.**

688 **S1 Dataset. Environmental variable data from all collection sites.**

689

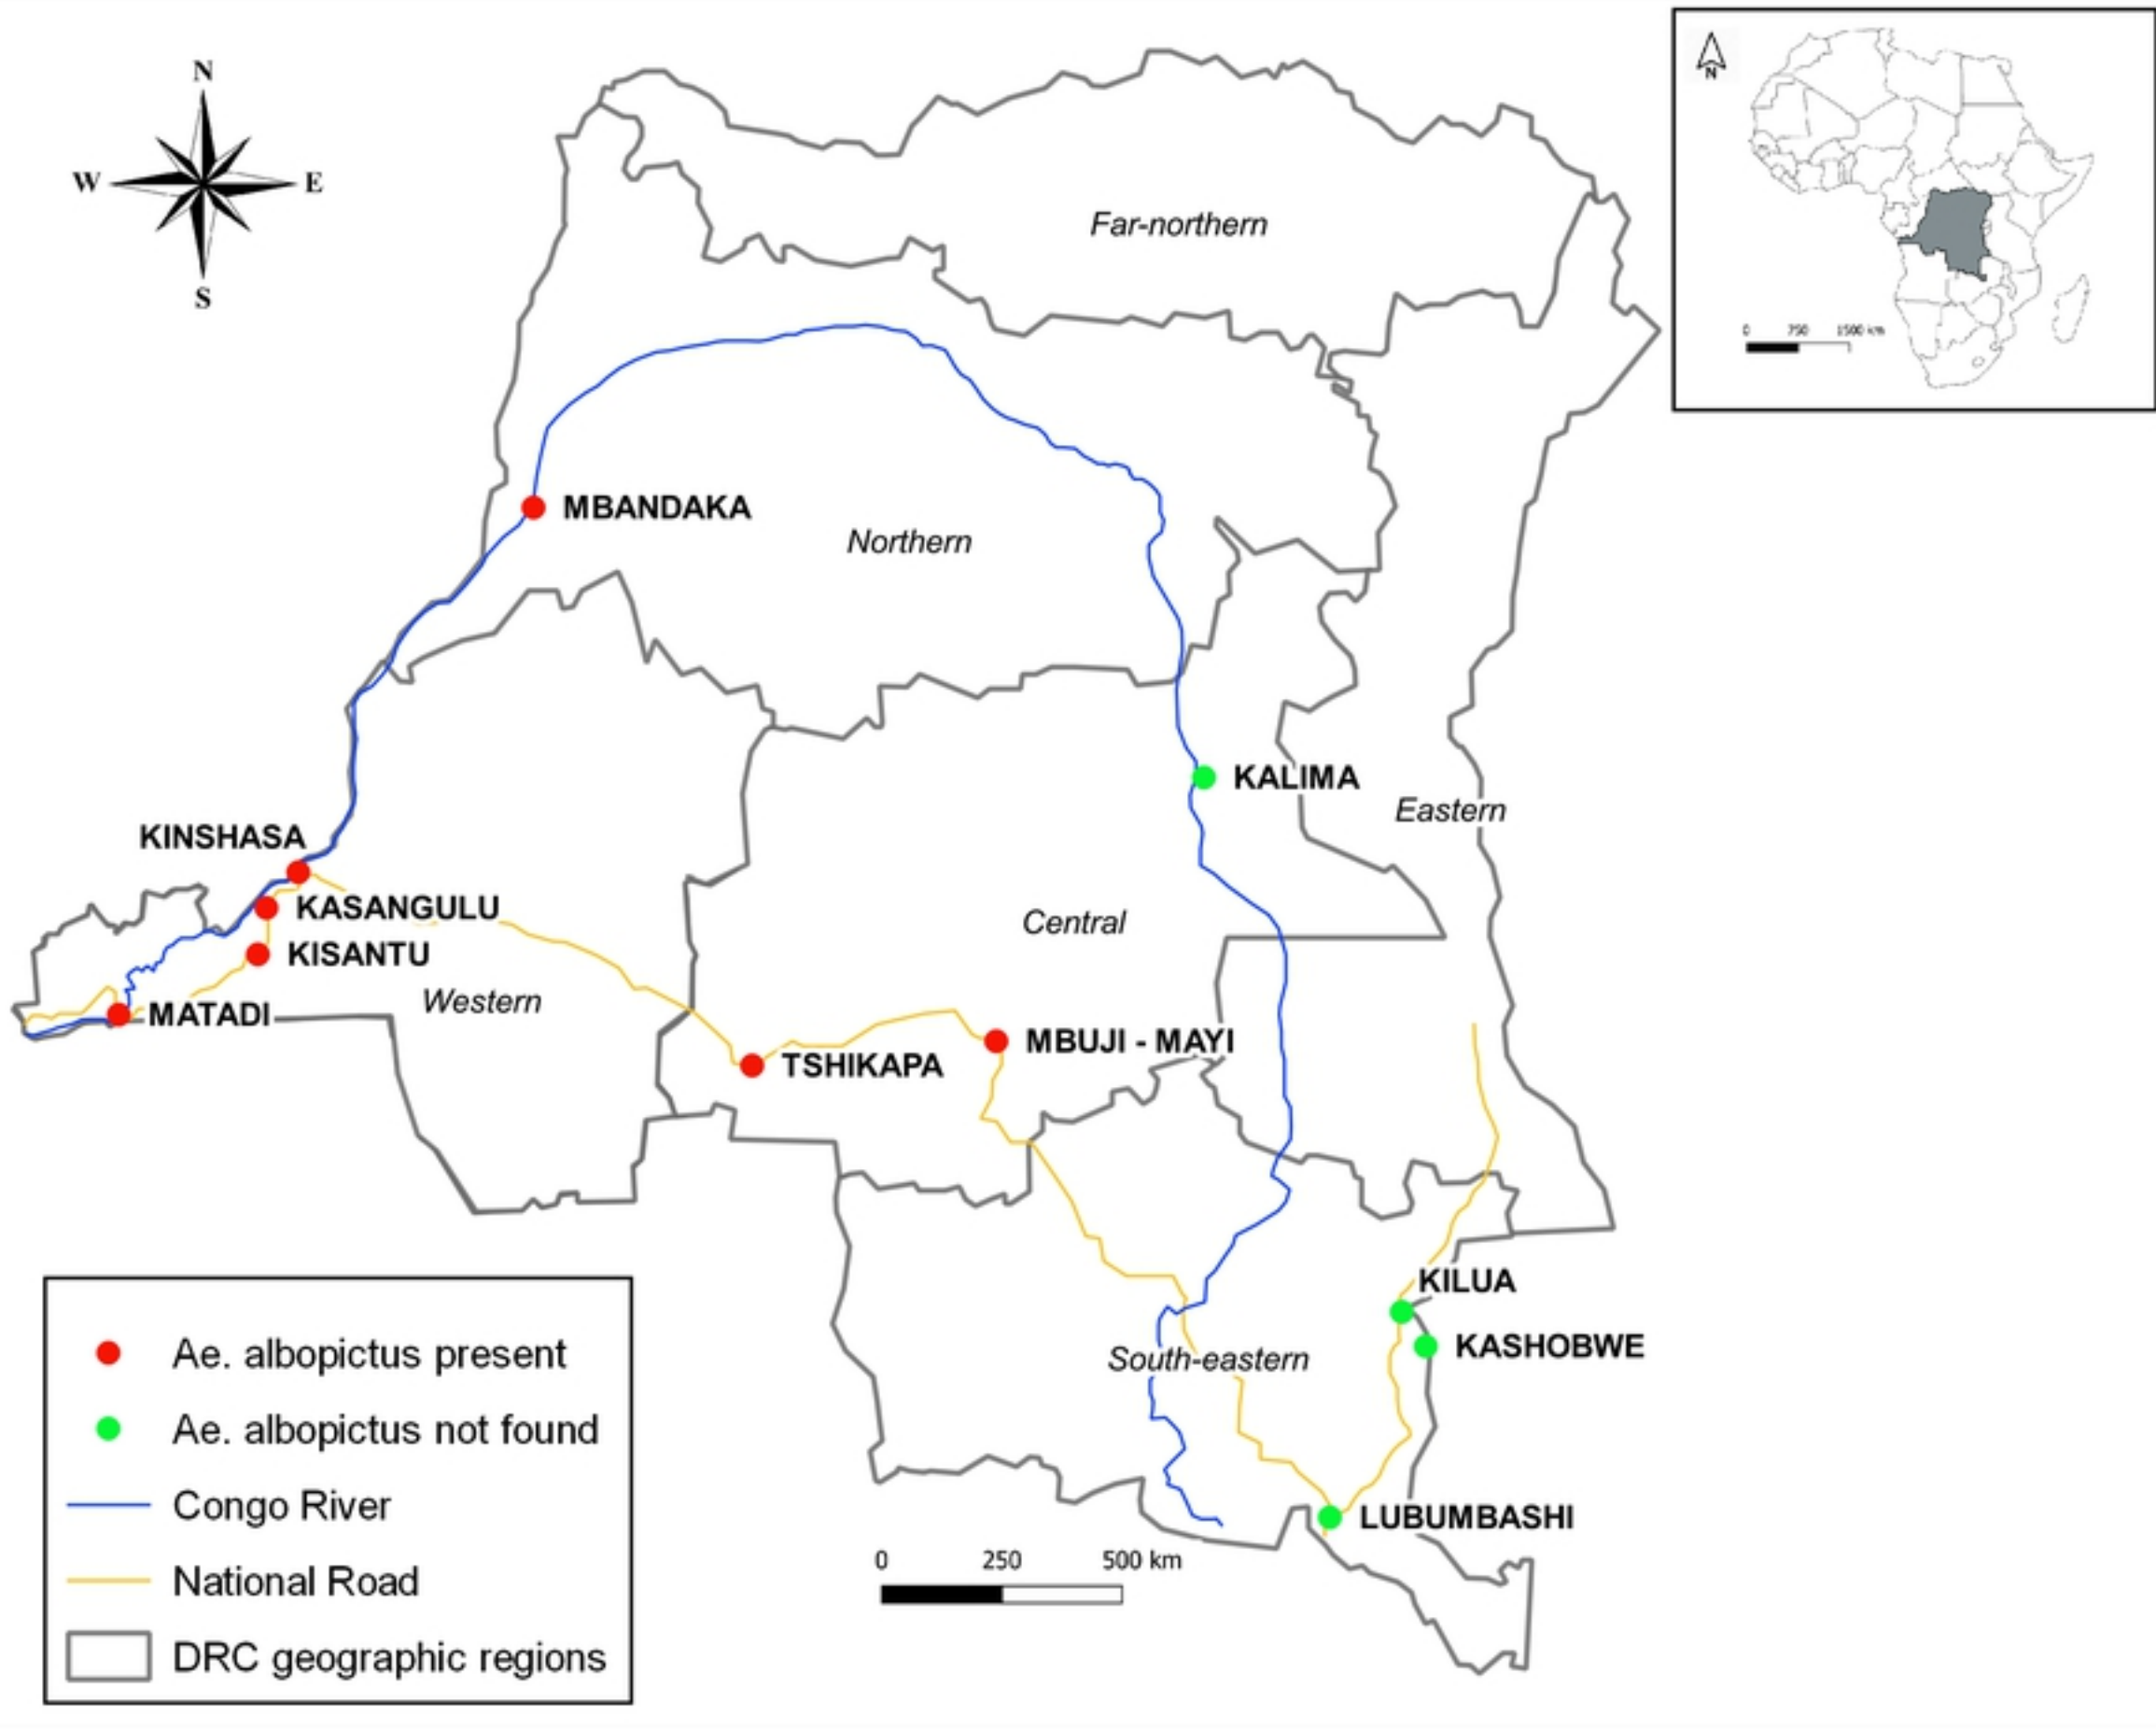

Figure

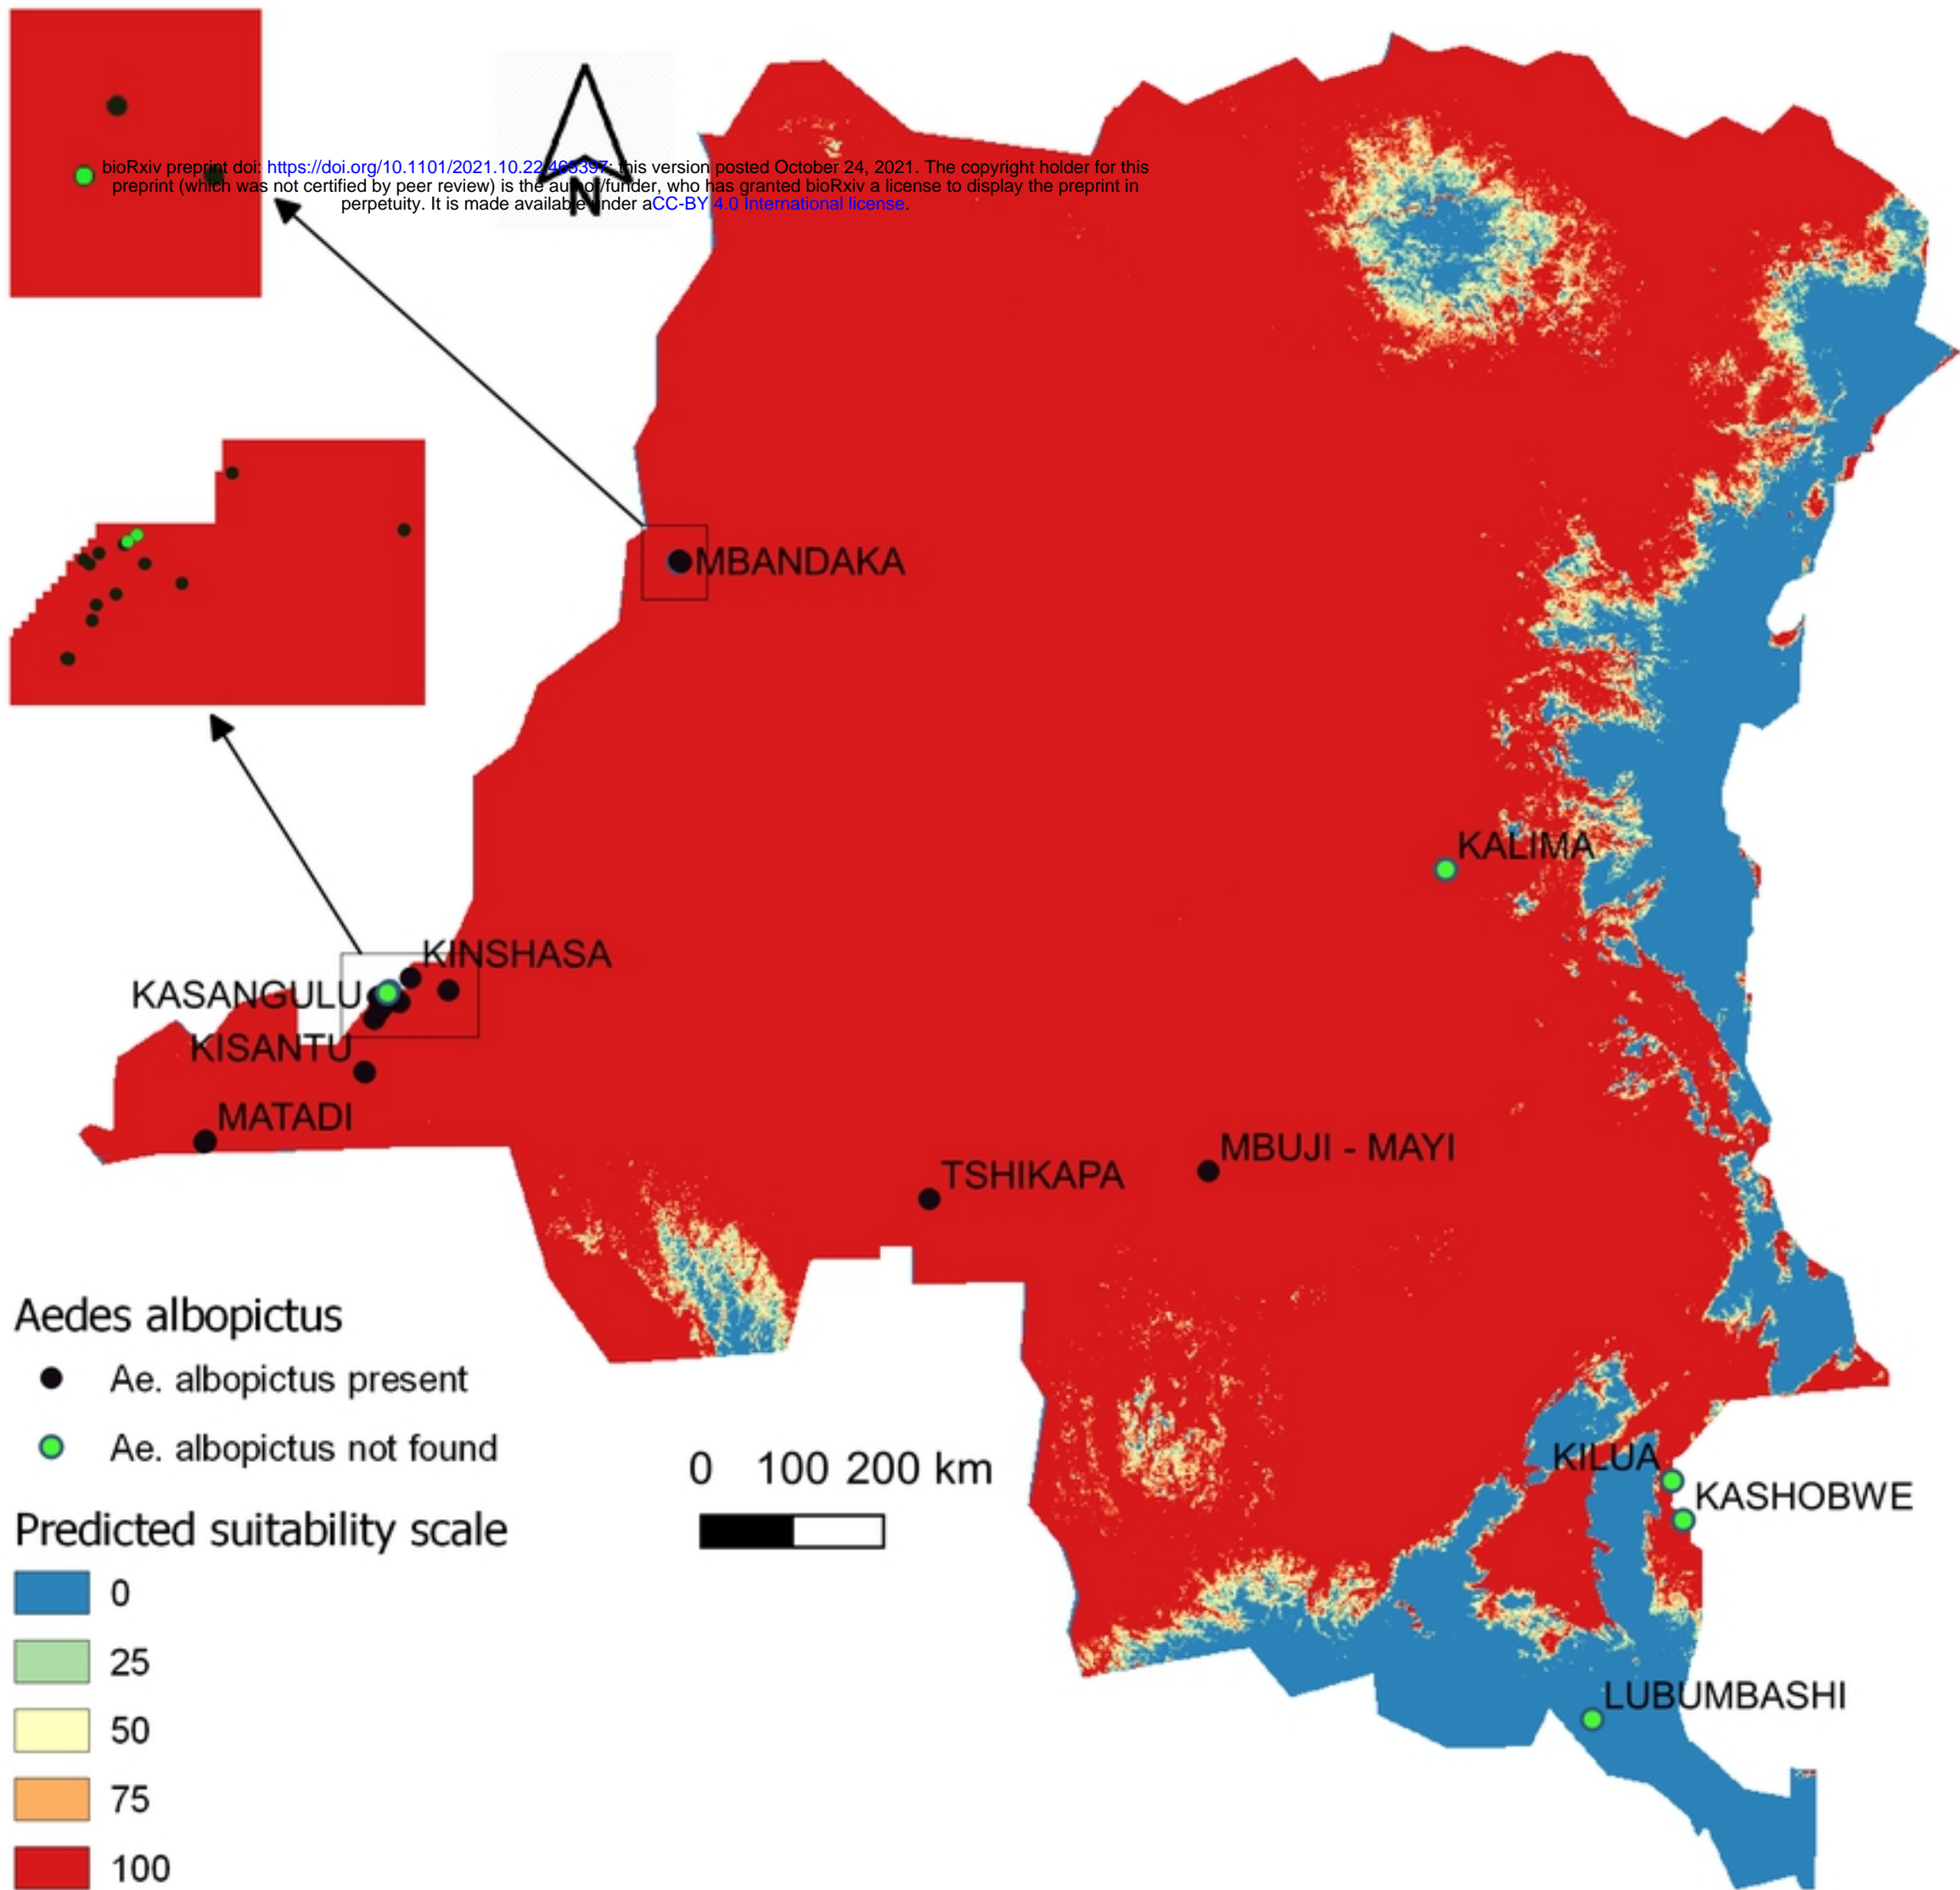

Figure

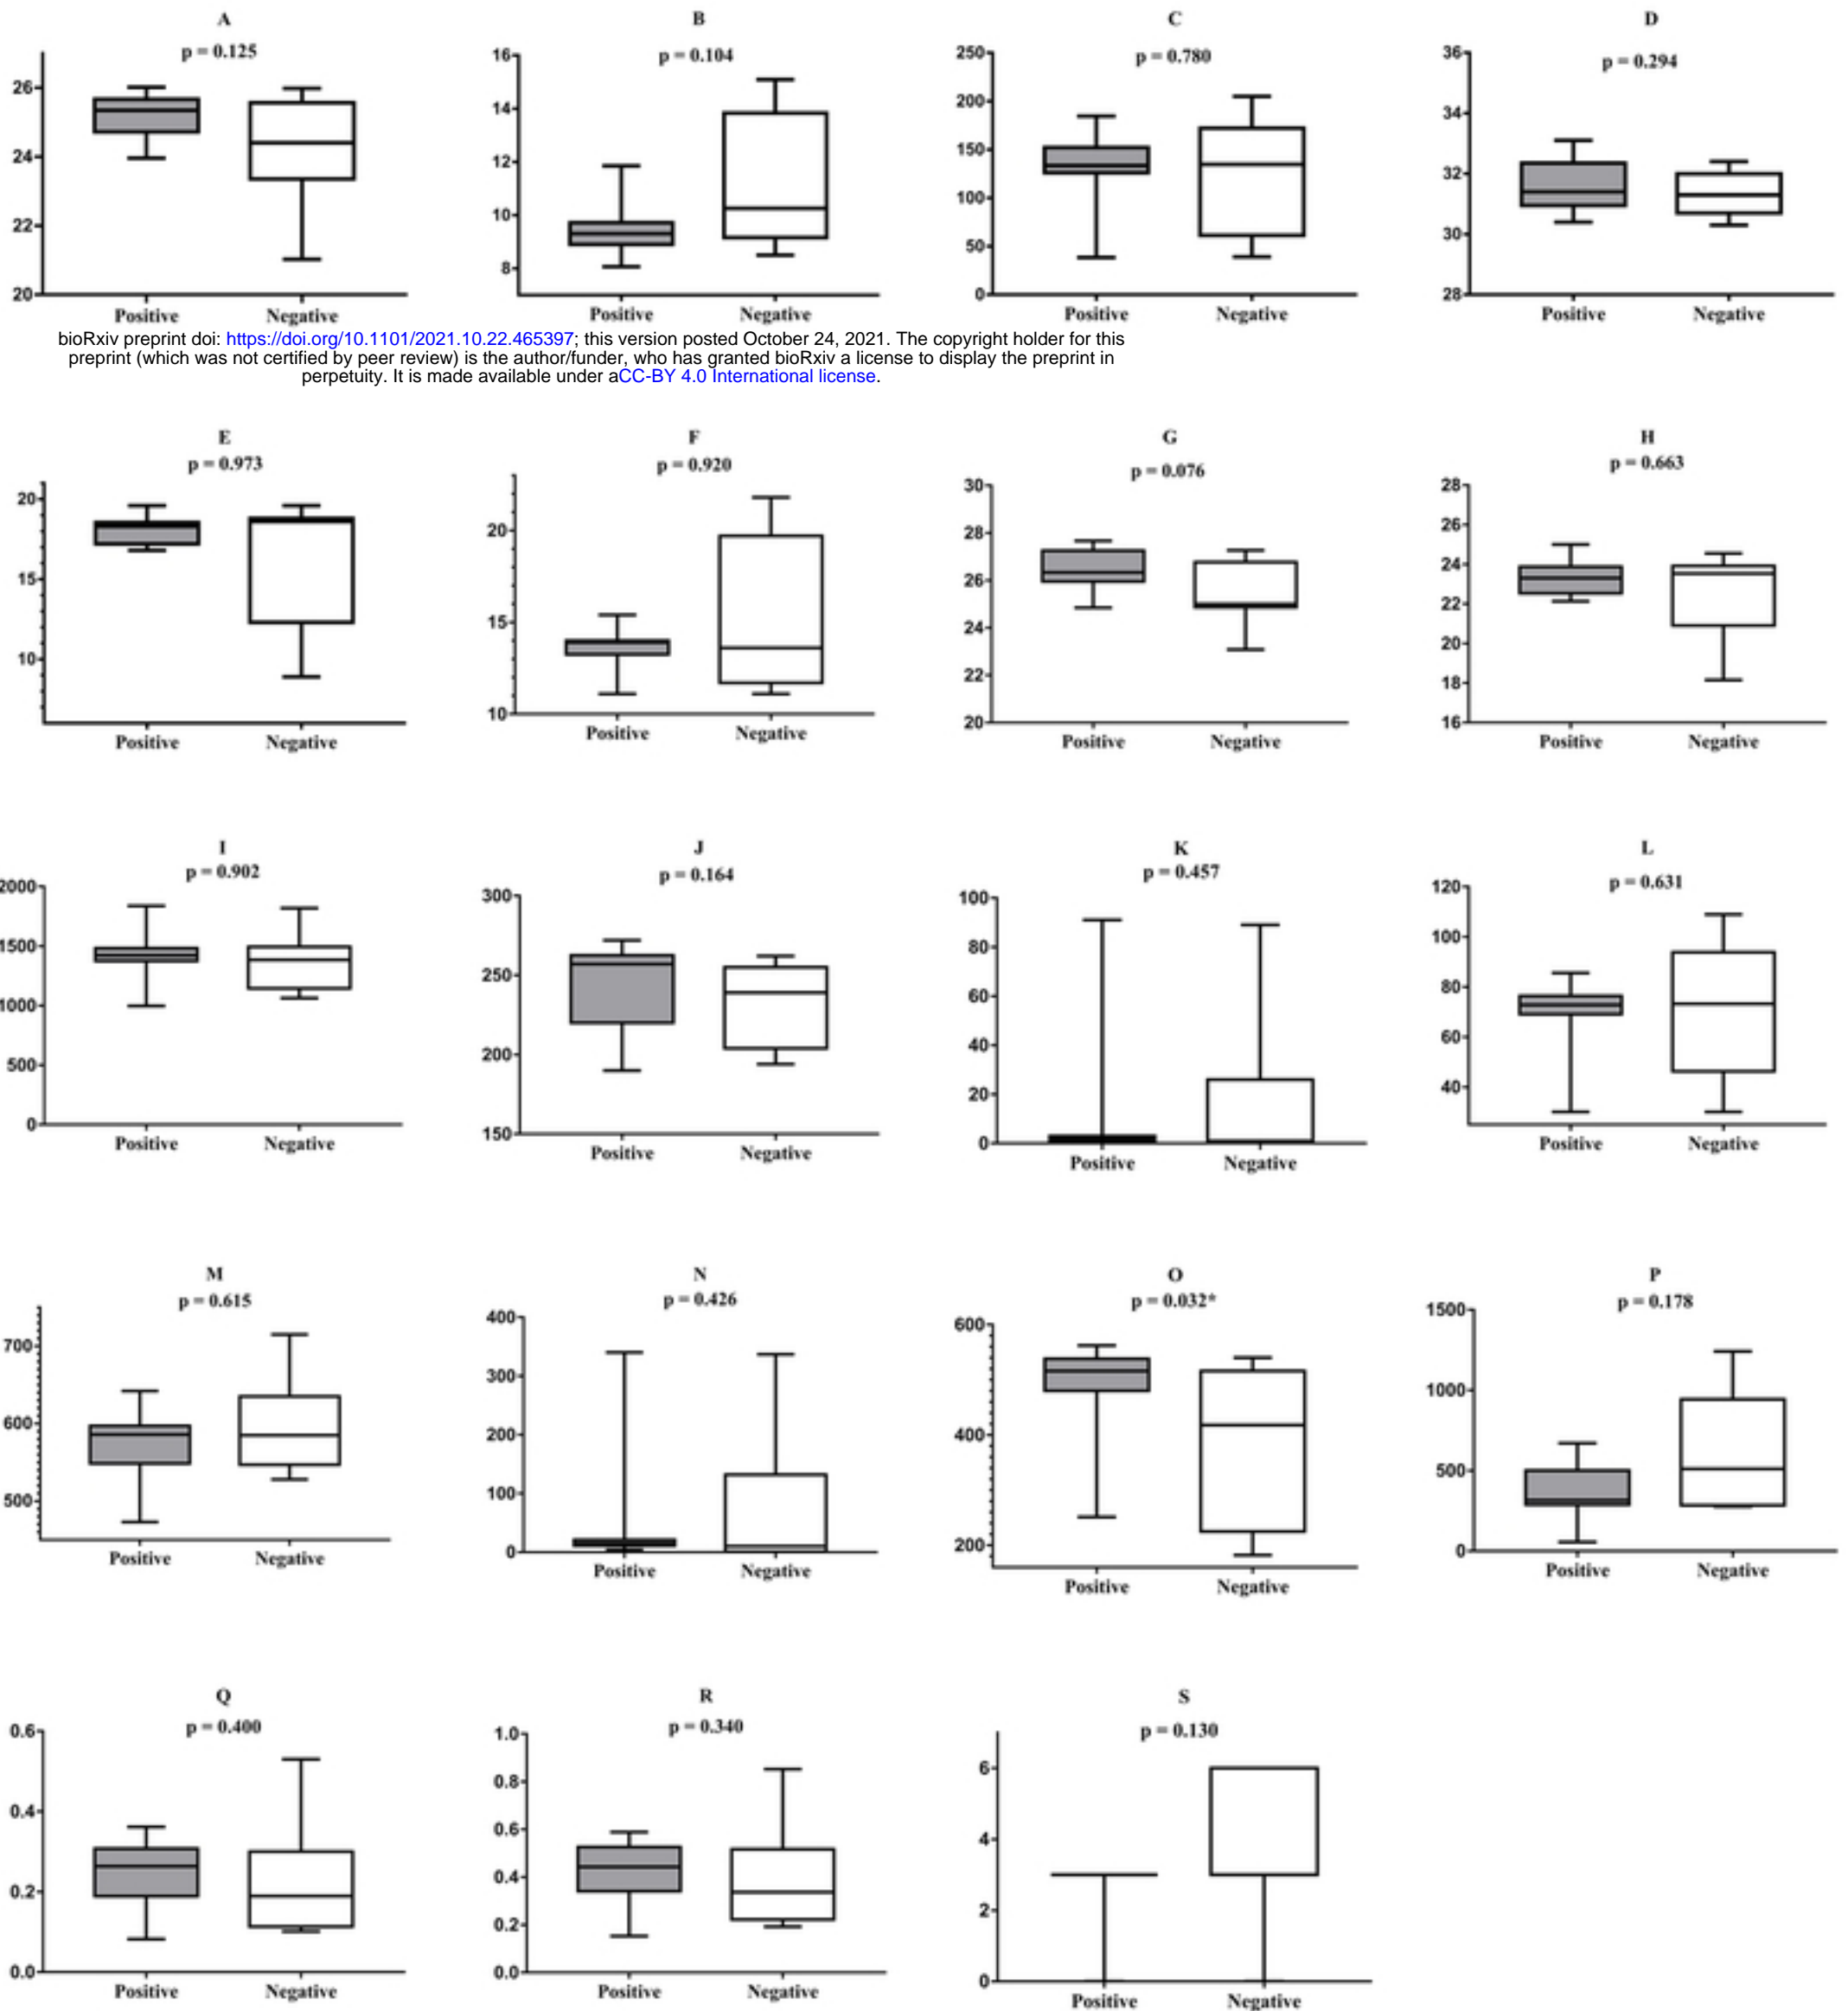

bioRxiv preprint doi: <https://doi.org/10.1101/2021.10.22.465397>; this version posted October 24, 2021. The copyright holder for this preprint (which was not certified by peer review) is the author/funder, who has granted bioRxiv a license to display the preprint in perpetuity. It is made available under aCC-BY 4.0 International license.

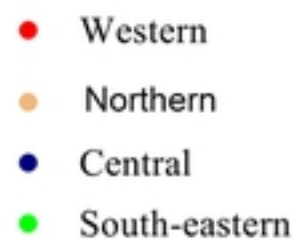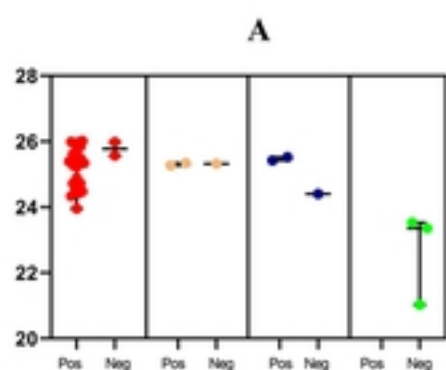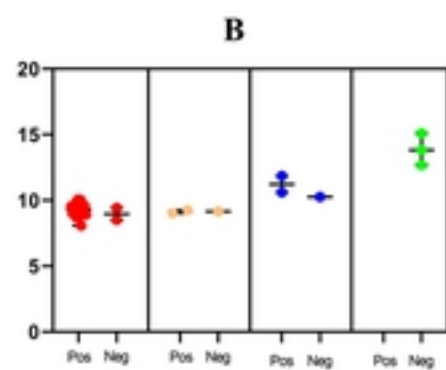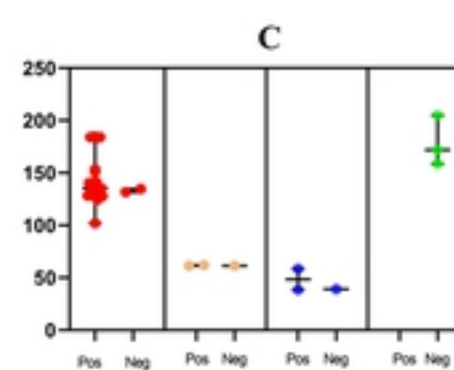

bioRxiv preprint doi: <https://doi.org/10.1101/2021.10.22.465397>; this version posted October 24, 2021. The copyright holder for this preprint (which was not certified by peer review) is the author/funder, who has granted bioRxiv a license to display the preprint in perpetuity. It is made available under aCC-BY 4.0 International license.

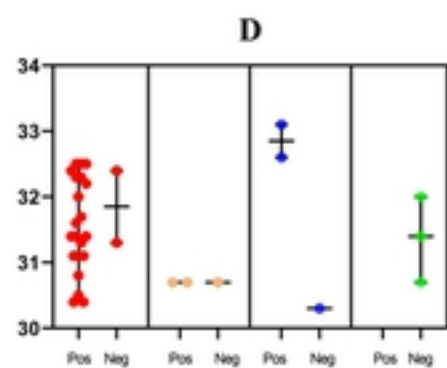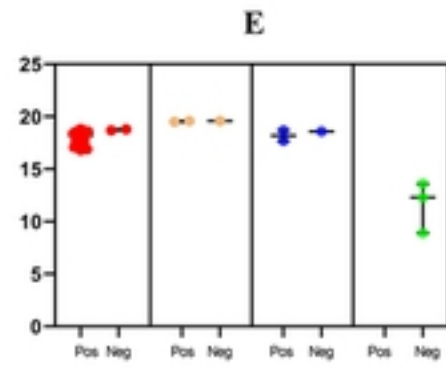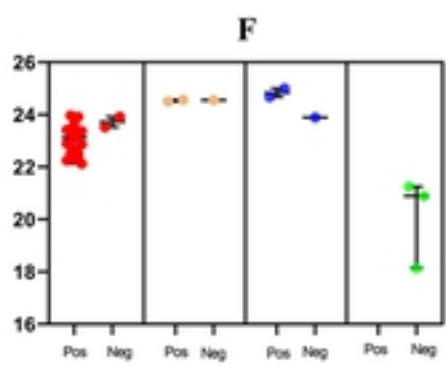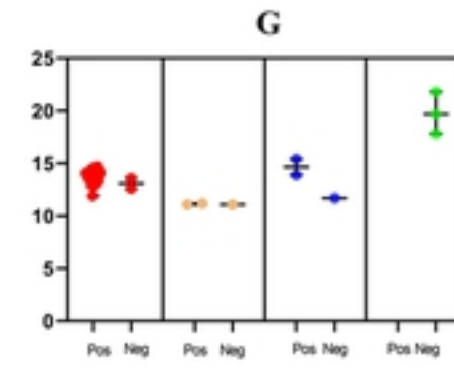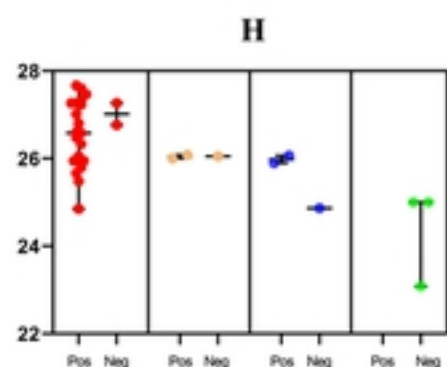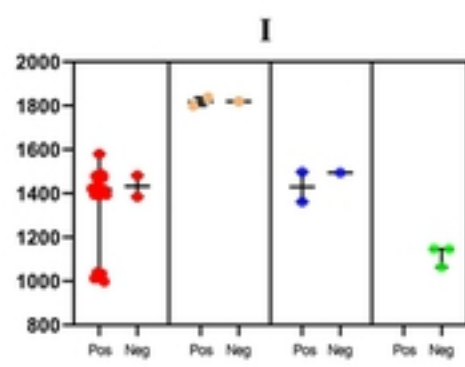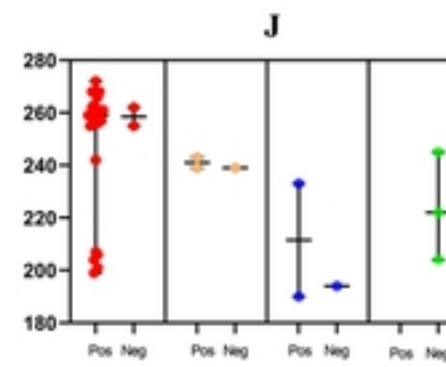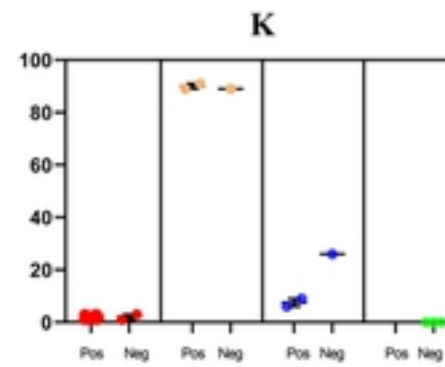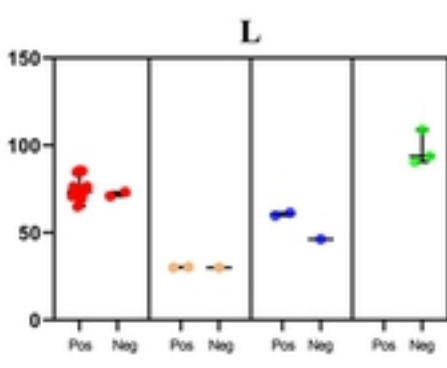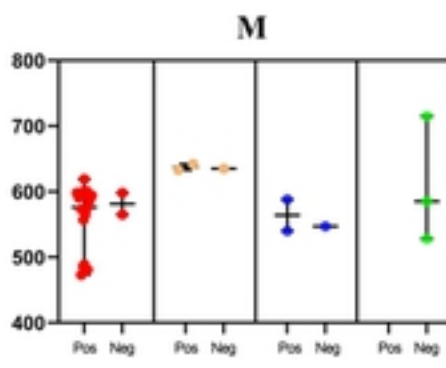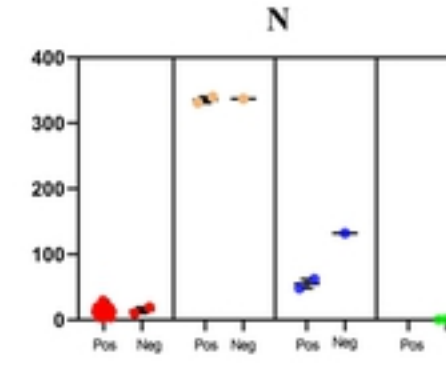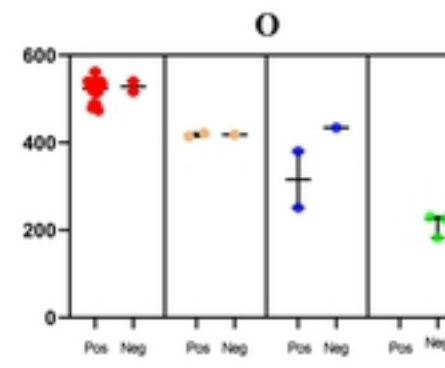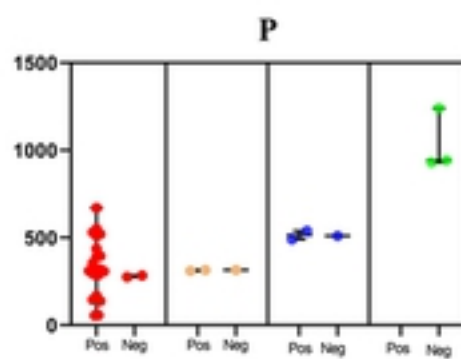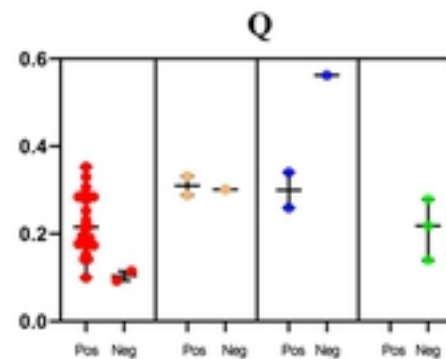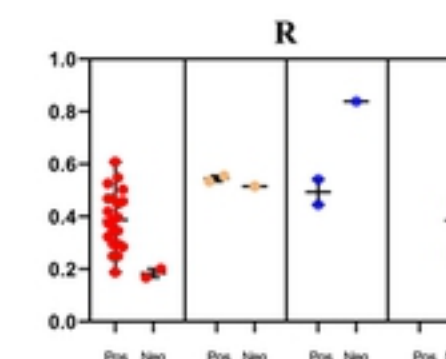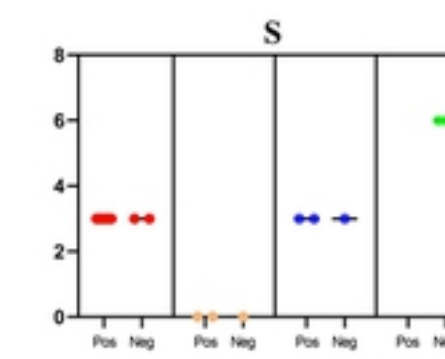

Figure

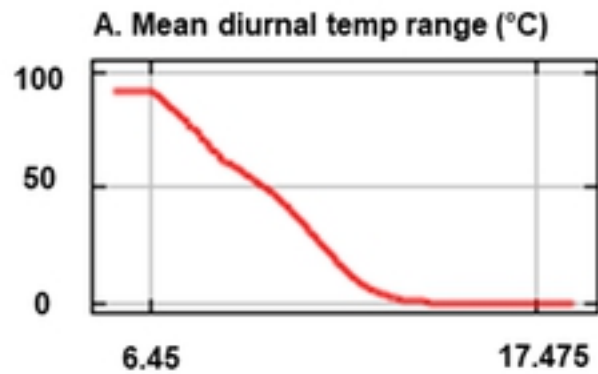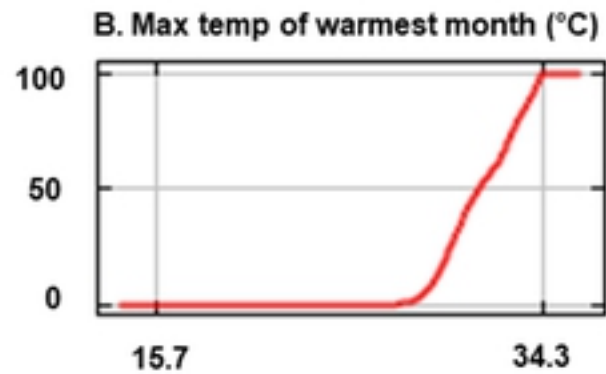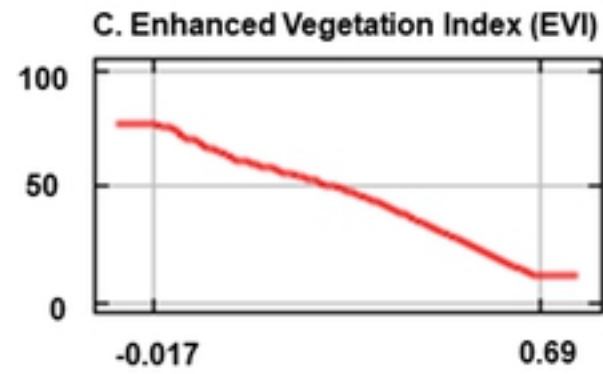

Figure
